# Supplementary material for: Palladium-catalyzed decarboxylative acylation of O-methyl ketoximes with α-keto acids
Source: Royal Society of Chemistry journal article supplement (doi:10.1039/c2cc38433g), 2012-12-04
Supplement: c2cc38433g.pdf [file c2cc38433g.pdf]

## Supplementary Information

### Palladium-Catalyzed Decarboxylative Acylation of *O*-Methyl Ketoximes with $\alpha$ -Keto Acids

Minyoung Kim, Jihye Park, Satyasheel Sharma, Aejin Kim, Eonjeong Park, Jong Hwan Kwak, Young Hoon Jung and In Su Kim\*

*School of Pharmacy, Sungkyunkwan University, Suwon 440-746, Republic of Korea*

\* Corresponding authors. Tel.: +82-31-290-7788; fax: +82-31-292-8800; e-mail: [insukim@skku.edu](mailto:insukim@skku.edu)

#### List of the Contents

|                                                                                                       |         |
|-------------------------------------------------------------------------------------------------------|---------|
| General methods -----                                                                                 | S2      |
| General procedure for the synthesis of <i>O</i> -methyl ketoximes -----                               | S3      |
| General procedure for the synthesis of <i>O</i> -methyl aldoximes -----                               | S3      |
| General procedure for the synthesis of $\alpha$ -keto acids -----                                     | S3      |
| Typical procedure for the acylation of <i>O</i> -methyl ketoximes or <i>O</i> -methyl aldoximes ----- | S4      |
| Characterization data for all products (3a-k, 4b-m, 6a and 6b) -----                                  | S4–S17  |
| <sup>1</sup> H NMR and <sup>13</sup> C NMR copies of all products (3a-k, 4b-m, 6a and 6b) -----       | S18–S42 |

## General methods

Commercially available reagents were used without additional purification, unless otherwise stated. Sealed tubes (13 x100 mm<sup>2</sup>) were purchased from Fischer Scientific and dried in oven for overnight and cooled at room temperature prior to use. Thin layer chromatography was carried out using plates coated with Kieselgel 60F<sub>254</sub> (Merck). For flash column chromatography, E. Merck Kieselgel 60 (230-400 mesh) was used. Nuclear magnetic resonance spectra (<sup>1</sup>H and <sup>13</sup>C NMR) were recorded on a Bruker Unity 400, 500 and 700 MHz spectrometers for CDCl<sub>3</sub> solutions and chemical shifts are reported as parts per million (ppm) relative to, respectively, residual CHCl<sub>3</sub> δ<sub>H</sub> (7.24 ppm) and CDCl<sub>3</sub> δ<sub>C</sub> (77.0 ppm) as internal standards. Resonance patterns are reported with the notations s (singlet), d (doublet), t (triplet), q (quartet), and m (multiplet). In addition, the notation br is used to indicate a broad signal. Coupling constants (*J*) are reported in hertz (Hz). IR spectra were recorded on a Varian 2000 Infrared spectrophotometer and are reported as cm<sup>-1</sup>. High-resolution mass spectra (HRMS) were recorded on a JEOL JMS-600 spectrometer.

### General procedure for the synthesis of *O*-methyl ketoximes

*O*-Methyl ketoximes were prepared from the corresponding methyl ketones and methoxylamine hydrochloride according to the reported procedure.<sup>1</sup>

### General procedure for the synthesis of *O*-methyl aldoximes

A solution of methoxylamine hydrochloride (1.34 g, 0.016 mol) in a mixture of water (15 mL) and THF (5 mL) was treated with sodium acetate (1.12 g, 0.014 mol) followed by the aldehydes (9.32 mmol, 1 equiv.) and the resulting mixture was stirred at room temperature for 4 h. The reaction mixture was then diluted with EtOAc, washed with brine, dried over Mg<sub>2</sub>SO<sub>4</sub> and concentrated in vacuo. The residue was purified by flash column chromatography (*n*-hexanes/EtOAc) to afford *O*-methyl aldoximes **5a** and **5b**.

### General procedure for the synthesis of $\alpha$ -keto acids

$\alpha$ -Keto acids were prepared from the oxidation of corresponding aryl methyl ketones with SeO<sub>2</sub> and pyridine according to the reported procedure.<sup>2</sup>

---

(1) Tsai, A. S.; Brasse, M.; Bergman, R. G.; Ellman, J. A. *Org. Lett.* **2011**, *13*, 540.

(2) Wadhwa, K.; Yang, C.-X.; West, P. R.; Deming, K. C.; Chemburkar, S. R.; Reddy, R. E. *Synth. Commun.* **2008**, *38*, 4434.

## Typical procedure for the acylation of *O*-methyl ketoximes or *O*-methyl aldoximes

To an oven-dried sealed tube charged with 4-fluoroacetophenone *O*-methyl oxime (**1a**) (50.2 mg, 0.3 mmol, 1.0 equiv.), Pd(OAc)<sub>2</sub> (6.7 mg, 0.03 mmol, 10 mol %), and (NH<sub>4</sub>)<sub>2</sub>S<sub>2</sub>O<sub>8</sub> (102.6 mg, 0.45 mmol, 1.5 equiv.) in diglyme (1 mL) was added phenylglyoxylic acid (**2a**) (67.6 mg, 0.45 mmol, 1.5 equiv.). The reaction mixture was allowed to stir at 70 °C for 3 h, and cooled to room temperature. The reaction mixture was diluted with EtOAc (3 mL) and concentrated in vacuo. The residue was purified by flash column chromatography (*n*-hexanes/EtOAc) to afford 58.9 mg of the acylated product **3a** in 72% yield.

## Characterization data for all products (3a-k, 4b-m, 6a and 6b)

### (5-Fluoro-2-(1-(methoxyimino)ethyl)phenyl)(phenyl)methanone (3a)

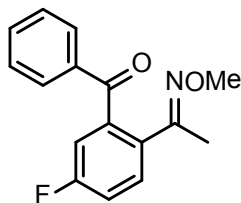

$R_f = 0.43$  (*n*-hexanes/EtOAc = 6:1);  $^1\text{H NMR}$  (400 MHz,  $\text{CDCl}_3$ )  $\delta$  7.72 (d,  $J = 7.6$  Hz, 2H), 7.56-7.42 (m, 4H), 7.25-7.19 (m, 2H), 3.68 (s, 3H), 2.04 (s, 3H);  $^{13}\text{C NMR}$  (100 MHz,  $\text{CDCl}_3$ )  $\delta$  195.9, 162.5 (d,  $J_{\text{C-F}} = 249.5$  Hz), 152.9, 140.9 (d,  $J_{\text{C-F}} = 6.4$  Hz), 137.5, 132.6 (d,  $J_{\text{C-F}} = 3.9$  Hz), 142.4, 129.6 (d,  $J_{\text{C-F}} = 8.0$  Hz), 129.2, 128.3, 117.0 (d,  $J_{\text{C-F}} = 21.5$  Hz), 116.1 (d,  $J_{\text{C-F}} = 22.4$  Hz), 61.7, 14.3; IR (KBr)  $\nu$  2937, 1671, 1600, 1578, 1492, 1408, 1369, 1318, 1274, 1177, 1069, 976, 828  $\text{cm}^{-1}$ ; HRMS (EI) Calcd for  $\text{C}_{16}\text{H}_{14}\text{FNO}_2$   $[\text{M}]^+$  271.1009, found 271.1011.

### (5-Chloro-2-(1-(methoxyimino)ethyl)phenyl)(phenyl)methanone (3b)

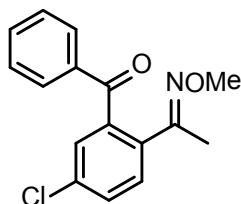

$R_f = 0.50$  (*n*-hexanes/EtOAc = 6:1);  $^1\text{H NMR}$  (400 MHz,  $\text{CDCl}_3$ )  $\delta$  7.67 (d,  $J = 7.8$  Hz, 2H), 7.51-7.37 (m, 6H), 3.62 (s, 3H), 1.99 (s, 3H);  $^{13}\text{C NMR}$  (100 MHz,  $\text{CDCl}_3$ )  $\delta$  195.9, 152.7, 140.4, 137.6, 134.8, 134.6, 132.8, 130.1, 129.2, 128.9, 128.8, 128.3, 61.7, 14.1; IR (KBr)  $\nu$  2936, 1671, 1594, 1479, 1449, 1369, 1315, 1283, 1179, 1105, 1048, 827  $\text{cm}^{-1}$ ; HRMS (EI) Calcd for  $\text{C}_{16}\text{H}_{14}\text{ClNO}_2$   $[\text{M}]^+$  287.0713, found 287.0713.

### (2-(1-(Methoxyimino)ethyl)-5-(trifluoromethyl)phenyl)(phenyl)methanone (3c)

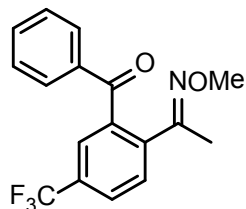

$R_f = 0.44$  (*n*-hexanes/EtOAc = 6:1);  $^1\text{H NMR}$  (400 MHz,  $\text{CDCl}_3$ )  $\delta$  7.76 (d,  $J = 8.2$  Hz, 1H), 7.70-7.67 (m, 3H), 7.61 (d,  $J = 8.2$  Hz, 1H), 7.53-7.51 (m, 1H), 7.42-7.38 (m, 2H), 3.65 (s, 3H), 2.03 (s, 3H);  $^{13}\text{C NMR}$  (100 MHz,  $\text{CDCl}_3$ )  $\delta$  196.0, 152.6, 139.5, 137.4, 132.9, 130.5 (q,  $J_{\text{C-F}} = 32.8$  Hz), 129.2, 128.4, 128.1, 126.8, 125.7, 124.9, 122.2 (q,  $J_{\text{C-F}} = 290.2$  Hz), 61.9, 14.1; IR (KBr)  $\nu$  2939, 1673, 1450, 1338, 1268, 1175, 1130, 1092, 1048, 840  $\text{cm}^{-1}$ ; HRMS (EI) Calcd for  $\text{C}_{17}\text{H}_{14}\text{F}_3\text{NO}_2$   $[\text{M}]^+$  321.0977, found 321.0972.

**(2-(1-(Methoxyimino)ethyl)phenyl)(phenyl)methanone (3d)**

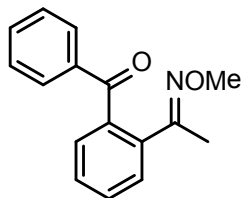

$R_f = 0.44$  (*n*-hexanes/EtOAc = 6:1);  $^1\text{H NMR}$  (400 MHz,  $\text{CDCl}_3$ )  $\delta$  7.67 (d,  $J = 7.6$  Hz, 2H), 7.36-7.51 (m, 7H), 3.66 (s, 3H), 2.01 (s, 3H);  $^{13}\text{C NMR}$  (100 MHz,  $\text{CDCl}_3$ )  $\delta$  197.5, 154.0, 138.9, 138.2, 136.4, 132.5, 130.1, 129.3, 129.0, 128.5, 128.2, 127.6, 61.6, 14.4; IR (KBr)  $\nu$  2935, 1668, 1597, 1449, 1367, 1314, 1286, 1154, 1048, 928  $\text{cm}^{-1}$ ; HRMS (EI) Calcd for  $\text{C}_{16}\text{H}_{15}\text{NO}_2$   $[\text{M}]^+$  253.1103, found 253.1103.

**(5-Methoxy-2-(1-(methoxyimino)ethyl)phenyl)(phenyl)methanone (3e)**

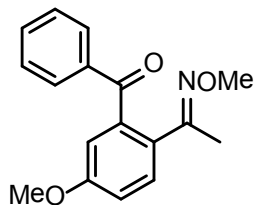

$R_f = 0.30$  (*n*-hexanes/EtOAc = 6:1);  $^1\text{H NMR}$  (400 MHz,  $\text{CDCl}_3$ )  $\delta$  7.69 (d,  $J = 7.6$  Hz, 2H), 7.47-7.51 (m, 1H), 7.35-7.42 (m, 3H), 7.02 (d,  $J = 8.6$  Hz, 1H), 6.97 (s, 1H), 3.83 (s, 3H), 3.61 (s, 3H), 1.97 (s, 3H);  $^{13}\text{C NMR}$  (100 MHz,  $\text{CDCl}_3$ )  $\delta$  197.2, 159.8, 153.3, 140.3, 138.1, 132.5, 129.2, 128.9, 128.6, 128.2, 115.9, 114.0, 61.5, 55.5, 14.1; IR (KBr)  $\nu$  2937, 1669, 1601, 1497, 1414, 1367, 1288, 1177, 1122, 1040, 896  $\text{cm}^{-1}$ ; HRMS (EI) Calcd for  $\text{C}_{17}\text{H}_{17}\text{NO}_3$   $[\text{M}]^+$  283.1208, found 283.1212.

**(3-(1-(Methoxyimino)ethyl)naphthalen-2-yl)(phenyl)methanone (3f)**

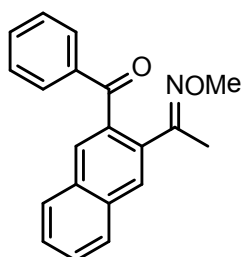

$R_f = 0.40$  (*n*-hexanes/EtOAc = 6:1);  $^1\text{H NMR}$  (400 MHz,  $\text{CDCl}_3$ )  $\delta$  7.85-7.95 (m, 3H), 7.75 (d,  $J = 7.6$  Hz, 2H), 7.50-7.59 (m, 4H), 7.37-7.41 (m, 2H), 3.69 (s, 3H), 2.13 (s, 3H);  $^{13}\text{C NMR}$  (100 MHz,  $\text{CDCl}_3$ )  $\delta$  197.2, 153.8, 138.4, 136.6, 133.6, 133.5, 132.5, 132.4, 129.4, 129.3, 128.4, 128.2, 128.1, 127.8, 127.5, 127.4, 61.7, 14.2; IR (KBr)  $\nu$  2935, 1742, 1681, 1597, 1451, 1365, 1282, 1193, 1053, 872  $\text{cm}^{-1}$ ; HRMS (EI) Calcd for  $\text{C}_{20}\text{H}_{17}\text{NO}_2$   $[\text{M}]^+$  303.1259, found 303.1261.

**(4-Fluoro-2-(1-(methoxyimino)ethyl)phenyl)(phenyl)methanone (3g)**

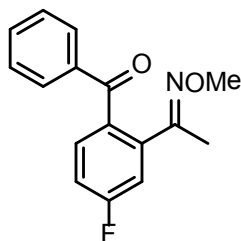

$R_f = 0.50$  (*n*-hexanes/EtOAc = 6:1);  $^1\text{H NMR}$  (400 MHz,  $\text{CDCl}_3$ )  $\delta$  7.61 (d,  $J = 7.8$  Hz, 2H), 7.46-7.39 (m, 2H), 7.33 (t,  $J = 7.4$  Hz, 2H), 7.19-7.08 (m, 2H), 3.62 (s, 3H), 1.93 (s, 3H);  $^{13}\text{C NMR}$  (100 MHz,  $\text{CDCl}_3$ )  $\delta$  196.4, 163.4 (d,  $J_{\text{C-F}} = 248.7$  Hz), 153.1, 139.2 (d,  $J_{\text{C-F}} =$

8.0 Hz), 138.1, 134.9 (d,  $J_{C-F} = 3.2$  Hz), 132.6, 131.3 (d,  $J_{C-F} = 8.7$  Hz), 129.2, 128.3, 115.4 (d,  $J_{C-F} = 21.3$  Hz), 114.9 (d,  $J_{C-F} = 23.0$  Hz), 61.8, 14.3; IR (KBr)  $\nu$  2937, 1669, 1604, 1448, 1369, 1283, 1203, 1148, 1047, 874  $\text{cm}^{-1}$ ; HRMS (EI) Calcd for  $\text{C}_{16}\text{H}_{14}\text{FO}_2$   $[\text{M}]^+$  271.1009, found 271.1002.

**(2-Fluoro-6-(1-(methoxyimino)ethyl)phenyl)(phenyl)methanone (3gg)**

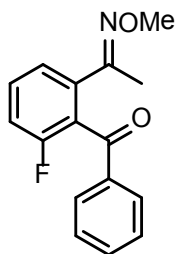

$R_f = 0.37$  (*n*-hexanes/EtOAc = 6:1);  $^1\text{H}$  NMR (400 MHz,  $\text{CDCl}_3$ )  $\delta$  7.73 (d,  $J = 7.6$  Hz, 2H), 7.33-7.47 (m, 4H), 7.24 (d,  $J = 7.8$  Hz, 1H), 7.06-7.11 (m, 1H), 3.49 (s, 3H), 2.01 (s, 3H);  $^{13}\text{C}$  NMR (100 MHz,  $\text{CDCl}_3$ )  $\delta$  193.1, 160.9, 158.4 (d,  $J_{C-F} = 246.4$  Hz), 138.0, 137.5, 137.4 (d,  $J_{C-F} = 4.1$  Hz), 133.0, 132.9 (d,  $J_{C-F} = 2.8$  Hz), 130.7, 130.6 (d,  $J_{C-F} = 8.5$  Hz), 130.2, 129.0, 128.4, 123.3, 123.2 (d,  $J_{C-F} = 3.1$  Hz), 116.3, 116.1 (d,  $J_{C-F} = 22.0$  Hz), 61.6, 13.6; IR (KBr)  $\nu$  2937, 1677, 1605, 1567, 1448, 1369, 1317, 1268, 1144, 1049, 945, 877  $\text{cm}^{-1}$ ; HRMS (EI) Calcd for  $\text{C}_{16}\text{H}_{14}\text{FO}_2$   $[\text{M}]^+$  271.1009, found 271.1008.

**(3-Fluoro-2-(1-(methoxyimino)ethyl)phenyl)(phenyl)methanone (3h)**

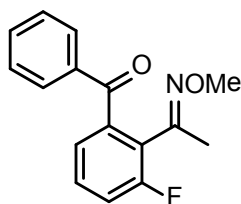

$R_f = 0.47$  (*n*-hexanes/EtOAc = 6:1);  $^1\text{H}$  NMR (400 MHz,  $\text{CDCl}_3$ )  $\delta$  7.73 (d,  $J = 7.7$  Hz, 2H), 7.55-7.59 (m, 1H), 7.43-7.49 (m, 3H), 7.25-7.32 (m, 2H), 3.70 (s, 3H), 2.06 (s, 3H);  $^{13}\text{C}$  NMR (100 MHz,  $\text{CDCl}_3$ )  $\delta$  196.1, 196.0 (d,  $J_{C-F} = 2.7$  Hz), 161.9, 159.4 (d,  $J_{C-F} = 249.2$  Hz), 151.7, 141.7, 141.6 (d,  $J_{C-F} = 2.9$  Hz), 137.9, 132.8, 130.3, 130.0, 129.9 (d,  $J_{C-F} = 8.6$  Hz), 129.4,



128.3, 124.5, 124.4 (d,  $J_{C-F} = 3.2$  Hz), 118.0, 117.8 (d,  $J_{C-F} = 22.0$  Hz), 61.8, 16.1, 16.0 (d,  $J_{C-F} = 4.3$  Hz); IR (KBr)  $\nu$  2937, 1671, 1599, 1451, 1367, 1315, 1284, 1177, 1059, 852  $\text{cm}^{-1}$ ; HRMS (EI) Calcd for  $\text{C}_{16}\text{H}_{14}\text{FO}_2$   $[\text{M}]^+$  271.1009, found 271.1010.

**(8-(Methoxyimino)-5,6,7,8-tetrahydronaphthalen-1-yl)(phenyl)methanone (3i)**

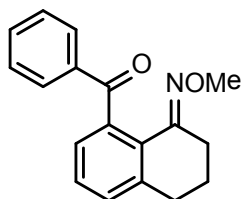

$R_f = 0.61$  (*n*-hexanes/EtOAc = 6:1);  $^1\text{H}$  NMR (500 MHz,  $\text{CDCl}_3$ )  $\delta$  7.71 (d,  $J = 7.8$  Hz, 2H), 7.47 (t,  $J = 7.4$  Hz, 1H), 7.39-7.33 (m, 3H), 7.27 (d,  $J = 8.7$  Hz, 1H), 7.20 (d,  $J = 7.4$  Hz, 1H), 3.54 (s, 3H), 2.81-2.78 (m, 2H), 2.59-2.56 (m, 2H), 1.88-1.84 (m, 2H);  $^{13}\text{C}$  NMR (125 MHz,  $\text{CDCl}_3$ )  $\delta$  198.1, 151.9, 140.8, 138.9, 138.5, 132.2, 129.8, 129.1, 129.0, 128.6, 128.3, 126.5, 61.8, 30.6, 24.4, 21.3; IR (KBr)  $\nu$  2932, 1666, 1596, 1446, 1313, 1280, 1166, 1040, 933, 808  $\text{cm}^{-1}$ ; HRMS (EI) Calcd for  $\text{C}_{18}\text{H}_{17}\text{NO}_2$   $[\text{M}]^+$  279.1259, found 279.1257.

**(3-Methoxy-8-(methoxyimino)-5,6,7,8-tetrahydronaphthalen-1-yl)(phenyl)methanone (3j)**

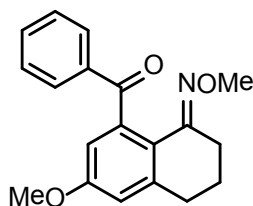

$R_f = 0.34$  (*n*-hexanes/EtOAc = 6:1);  $^1\text{H}$  NMR (400 MHz,  $\text{CDCl}_3$ )  $\delta$  7.70 (d,  $J = 7.8$  Hz, 2H), 7.43-7.47 (m, 1H), 7.32-7.36 (m, 2H), 7.74 (d,  $J = 16.32$  Hz, 2H), 3.79 (s, 3H), 3.48 (s, 3H), 2.72-2.75 (m, 2H), 2.50-2.53 (m, 2H), 1.79-1.84 (m, 2H);  $^{13}\text{C}$  NMR (100 MHz,  $\text{CDCl}_3$ )  $\delta$  197.3, 159.5, 151.4, 142.3, 140.2, 138.1, 132.0, 128.9, 128.1, 121.5, 114.6, 112.1, 61.3, 55.4, 30.6, 24.0, 21.1; IR (KBr)  $\nu$  2936, 1671, 1595, 1470, 1354, 1289, 1214, 1175, 1087, 1013, 879  $\text{cm}^{-1}$ ; HRMS (EI) Calcd for  $\text{C}_{19}\text{H}_{19}\text{NO}_3$   $[\text{M}]^+$  309.1365, found 309.1370.

**(4-(Methoxyimino)chroman-5-yl)(phenyl)methanone (3k)**

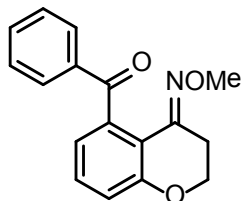

$R_f = 0.39$  (*n*-hexanes/EtOAc = 6:1);  $^1\text{H NMR}$  (400 MHz,  $\text{CDCl}_3$ )  $\delta$  7.73 (d,  $J = 7.8$  Hz, 2H), 7.48-7.29 (m, 4H), 6.99 (d,  $J = 8.2$  Hz, 1H), 6.87 (d,  $J = 7.4$  Hz, 1H), 4.19 (t,  $J = 6.2$  Hz, 2H), 3.49 (s, 3H), 2.77 (t,  $J = 6.2$  Hz, 2H);  $^{13}\text{C NMR}$  (100 MHz,  $\text{CDCl}_3$ )  $\delta$  197.2, 156.8, 145.9, 138.8, 137.9, 132.3, 130.3, 129.0, 128.2, 120.9, 118.7, 116.2, 74.9, 71.7, 23.9; IR (KBr)  $\nu$  2937, 1673, 1595, 1469, 1318, 1279, 1145, 1079, 945, 850  $\text{cm}^{-1}$ ; HRMS (EI) Calcd for  $\text{C}_{17}\text{H}_{15}\text{NO}_3$   $[\text{M}]^+$  281.1052, found 281.1049.

**(8-(Methoxyimino)-5,6,7,8-tetrahydronaphthalen-1-yl)(4-methoxyphenyl)methanone (4b)**

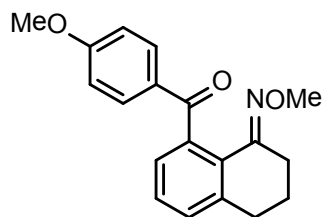

$R_f = 0.23$  (*n*-hexanes/EtOAc = 6:1);  $^1\text{H NMR}$  (400 MHz,  $\text{CDCl}_3$ )  $\delta$  7.70 (d,  $J = 8.2$  Hz, 2H), 7.36-7.25 (m, 2H), 7.18 (d,  $J = 7.4$  Hz, 1H), 6.87 (d,  $J = 8.2$  Hz, 2H), 3.85 (s, 3H), 3.57 (s, 3H), 2.82-2.79 (m, 2H), 2.62-2.59 (m, 2H), 1.90-1.83 (m, 2H);  $^{13}\text{C NMR}$  (175 MHz,  $\text{CDCl}_3$ )  $\delta$  196.9, 162.7, 151.7, 140.5, 138.9, 131.3, 131.1, 129.3, 128.6, 128.3, 126.2, 113.3, 61.6, 55.4, 30.4, 24.2, 21.1; IR (KBr)  $\nu$  2937, 1663, 1578, 1460, 1419, 1311, 1256, 1169, 1049, 880  $\text{cm}^{-1}$ ; HRMS (EI) Calcd for  $\text{C}_{19}\text{H}_{19}\text{NO}_3$   $[\text{M}]^+$  309.1365, found 309.1379.

**(8-(Methoxyimino)-5,6,7,8-tetrahydronaphthalen-1-yl)(4-(trifluoromethyl)phenyl)methanone (4c)**

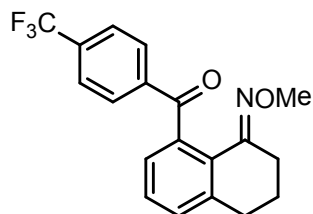

$R_f = 0.41$  (*n*-hexanes/EtOAc = 6:1);  $^1\text{H NMR}$  (400 MHz,  $\text{CDCl}_3$ )  $\delta$  7.79 (d,  $J = 8.1$  Hz, 2H), 7.61 (d,  $J = 8.1$  Hz, 2H), 7.37-7.27 (m, 2H), 7.17 (d,  $J = 7.4$  Hz, 1H), 3.51 (s, 3H), 2.79 (t,  $J = 5.9$  Hz, 2H), 2.55 (t,  $J = 5.9$  Hz, 2H), 1.97-1.80 (m, 2H);  $^{13}\text{C NMR}$  (175 MHz,  $\text{CDCl}_3$ )  $\delta$  196.5, 151.8, 141.2, 140.7, 137.7, 133.5 (q,  $J_{\text{C-F}} = 32.2$  Hz), 130.1, 129.0, 128.7, 128.6, 126.3, 125.2 (q,  $J_{\text{C-F}} = 3.5$  Hz), 123.7 (q,  $J_{\text{C-F}} = 272.2$  Hz), 61.6, 30.3, 24.2, 20.9; IR (KBr)  $\nu$  2939, 1677, 1584, 1460, 1326, 1279, 1180, 1108, 1051, 857  $\text{cm}^{-1}$ ; HRMS (EI) Calcd for  $\text{C}_{19}\text{H}_{16}\text{F}_3\text{NO}_2$   $[\text{M}]^+$  347.1133, found 347.1134.

**(4-Fluorophenyl)(8-(methoxyimino)-5,6,7,8-tetrahydronaphthalen-1-yl)methanone (4d)**

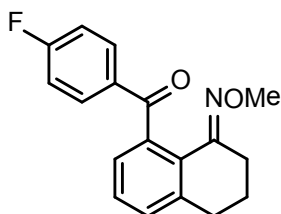

$R_f = 0.38$  (*n*-hexanes/EtOAc = 6:1);  $^1\text{H NMR}$  (400 MHz,  $\text{CDCl}_3$ )  $\delta$  7.66-7.63 (m, 2H), 7.25 (d,  $J = 7.4$  Hz, 1H), 7.19 (d,  $J = 7.2$  Hz, 1H), 7.09 (d,  $J = 7.4$  Hz, 1H), 6.96 (t,  $J = 8.4$  Hz, 2H), 3.46 (s, 3H), 2.71 (t,  $J = 5.9$  Hz, 2H), 2.50 (t,  $J = 6.6$  Hz, 2H), 1.80-1.73 (m, 2H);  $^{13}\text{C NMR}$  (100 MHz,  $\text{CDCl}_3$ )  $\delta$  196.3, 165.0 (d,  $J_{\text{C-F}} = 251.6$  Hz), 151.7, 140.6, 138.3, 134.8 (d,  $J_{\text{C-F}} = 2.9$  Hz), 131.4 (d,  $J_{\text{C-F}} = 9.1$  Hz), 129.7, 128.6, 128.4, 126.2, 115.2 (d,  $J_{\text{C-F}} = 21.7$  Hz), 61.5, 30.3, 24.2, 21.0; IR (KBr)  $\nu$  2938, 1672, 1597, 1460, 1280, 1192, 1050, 1009, 850  $\text{cm}^{-1}$ ; HRMS (EI) Calcd for  $\text{C}_{18}\text{H}_{16}\text{FNO}_2$   $[\text{M}]^+$  297.1165, found 297.1162.

**(4-Chlorophenyl)(8-(methoxyimino)-5,6,7,8-tetrahydronaphthalen-1-yl)methanone (4e)**

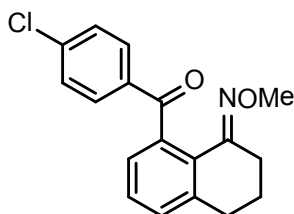

$R_f = 0.61$  (*n*-hexanes/EtOAc = 6:1);  $^1\text{H NMR}$  (400 MHz,  $\text{CDCl}_3$ )  $\delta$  7.67 (d,  $J = 7.8$  Hz, 2H), 7.38-7.30 (m, 4H), 7.19 (d,  $J = 7.4$  Hz, 1H), 3.58 (s, 3H), 2.83-2.80 (m, 2H), 2.60 (t,  $J = 6.6$  Hz, 2H), 1.89-1.85 (m, 2H);  $^{13}\text{C NMR}$  (100 MHz,  $\text{CDCl}_3$ )  $\delta$  196.6, 151.7, 140.6, 138.3, 138.1, 136.7, 130.2, 129.8, 128.7, 128.5, 128.4, 126.2, 71.6, 30.3, 24.2, 21.0; IR (KBr)  $\nu$  2937, 1673, 1587, 1459, 1399, 1281, 1171, 1050, 1008, 845  $\text{cm}^{-1}$ ; HRMS (EI) Calcd for  $\text{C}_{18}\text{H}_{16}\text{ClNO}_2$   $[\text{M}]^+$  313.0870, found 313.0874.

**(4-Bromophenyl)(8-(methoxyimino)-5,6,7,8-tetrahydronaphthalen-1-yl)methanone (4f)**

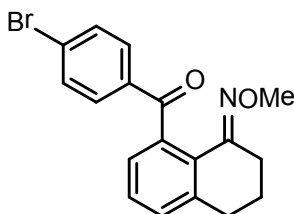

$R_f = 0.61$  (*n*-hexanes/EtOAc = 6:1);  $^1\text{H NMR}$  (400 MHz,  $\text{CDCl}_3$ )  $\delta$  7.60-7.52 (m, 4H), 7.37-7.29 (m, 2H), 7.19 (d,  $J = 7.4$  Hz, 1H), 3.58 (s, 3H), 2.83-2.80 (m, 2H), 2.60 (t,  $J = 6.6$  Hz, 2H), 1.89-1.86 (m, 2H);  $^{13}\text{C NMR}$  (100 MHz,  $\text{CDCl}_3$ )  $\delta$  196.8, 151.7, 140.7, 138.0, 137.2, 131.4, 130.4, 129.8, 128.7, 128.5, 127.0, 126.2, 71.6, 30.3, 24.2, 21.0; IR (KBr)  $\nu$  2936, 1673, 1586, 1459, 1352, 1280, 1172, 1105, 1050, 842  $\text{cm}^{-1}$ ; HRMS (EI) Calcd for  $\text{C}_{18}\text{H}_{16}\text{BrNO}_2$   $[\text{M}]^+$  357.0364, found 357.0363.

**(8-(Methoxyimino)-5,6,7,8-tetrahydronaphthalen-1-yl)(*m*-tolyl)methanone (4g)**

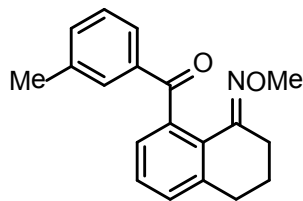

$R_f = 0.39$  (*n*-hexanes/EtOAc = 6:1);  $^1\text{H NMR}$  (400 MHz,  $\text{CDCl}_3$ )  $\delta$  7.60 (s, 1H), 7.48 (d,  $J = 7.4$  Hz, 1H), 7.39-7.21 (m, 5H), 3.58 (s, 3H), 2.83-2.80 (m, 2H), 2.59 (t,  $J = 6.6$  Hz, 2H), 2.37 (s, 3H), 1.89-1.86 (m, 2H);  $^{13}\text{C NMR}$  (100 MHz,  $\text{CDCl}_3$ )  $\delta$  198.1, 151.7, 140.5, 138.8, 138.3, 137.8, 132.8, 129.5, 129.4, 128.8, 128.3, 127.9, 126.4, 126.3, 61.5, 30.3, 24.2, 21.3, 21.1; IR (KBr)  $\nu$  2937, 1670, 1585, 1458, 1283, 1143, 1050, 860  $\text{cm}^{-1}$ ; HRMS (EI) Calcd for  $\text{C}_{19}\text{H}_{19}\text{NO}_2$   $[\text{M}]^+$  293.1416, found 293.1418.

**(8-(Methoxyimino)-5,6,7,8-tetrahydronaphthalen-1-yl)(3-nitrophenyl)methanone (4h)**

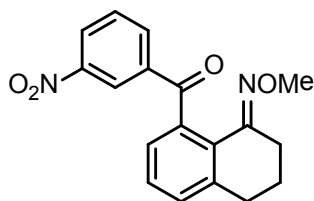

$R_f = 0.31$  (*n*-hexanes/EtOAc = 6:1);  $^1\text{H NMR}$  (400 MHz,  $\text{CDCl}_3$ )  $\delta$  8.37 (s, 1H), 8.25 (d,  $J = 8.2$  Hz, 1H), 8.01 (d,  $J = 8.2$  Hz, 1H), 7.51 (t,  $J = 7.9$  Hz, 1H), 7.35-7.26 (m, 2H), 7.18-7.15 (m, 1H), 3.45 (s, 3H), 2.77-2.74 (m, 2H), 2.48 (t,  $J = 6.6$  Hz, 2H), 1.83-1.77 (m, 2H);  $^{13}\text{C NMR}$  (100 MHz,  $\text{CDCl}_3$ )  $\delta$  195.1, 152.0, 148.3, 141.0, 140.0, 137.0, 134.1, 130.5, 129.4, 128.9, 128.8, 126.5, 126.3, 123.6, 61.6, 30.2, 24.3, 20.9; IR (KBr)  $\nu$  2937, 1679, 1583, 1502, 1437, 1350, 1192, 1086, 1049, 887  $\text{cm}^{-1}$ ; HRMS (EI) Calcd for  $\text{C}_{18}\text{H}_{16}\text{N}_2\text{O}_4$   $[\text{M}]^+$  324.1110, found 324.1118.

**(3-Fluorophenyl)(8-(methoxyimino)-5,6,7,8-tetrahydronaphthalen-1-yl)methanone (4i)**

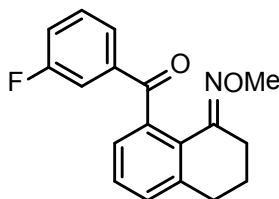

S13

$R_f = 0.61$  (*n*-hexanes/EtOAc = 6:1);  $^1\text{H NMR}$  (400 MHz,  $\text{CDCl}_3$ )  $\delta$  7.38-7.36 (m, 2H), 7.28-7.22 (m, 3H), 7.11 (d,  $J = 7.8$  Hz, 2H), 3.49 (s, 3H), 2.72 (t,  $J = 5.9$  Hz, 2H), 2.50 (t,  $J = 6.6$  Hz, 2H), 1.80-1.76 (m, 2H);  $^{13}\text{C NMR}$  (100 MHz,  $\text{CDCl}_3$ )  $\delta$  196.4, 162.6 (d,  $J_{\text{C-F}} = 245.5$  Hz), 151.7, 140.6 (d,  $J_{\text{C-F}} = 5.9$  Hz), 137.9, 129.9, 129.7, 128.7, 128.5, 126.3, 124.6 (d,  $J_{\text{C-F}} = 2.8$  Hz), 119.0 (d,  $J_{\text{C-F}} = 21.3$  Hz), 115.4 (d,  $J_{\text{C-F}} = 22.0$  Hz), 61.6, 30.3, 24.2, 21.0; IR (KBr)  $\nu$  2937, 1675, 1609, 1588, 1442, 1284, 1172, 1131, 1050, 862  $\text{cm}^{-1}$ ; HRMS (EI) Calcd for  $\text{C}_{18}\text{H}_{16}\text{FNO}_2$   $[\text{M}]^+$  297.1165, found 297.1162.

**(8-(Methoxyimino)-5,6,7,8-tetrahydronaphthalen-1-yl)(naphthalen-2-yl)methanone (4j)**

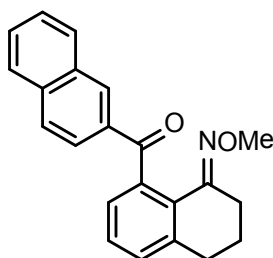

$R_f = 0.38$  (*n*-hexanes/EtOAc = 6:1);  $^1\text{H NMR}$  (400 MHz,  $\text{CDCl}_3$ )  $\delta$  8.06 (s, 1H), 8.00 (d,  $J = 8.6$  Hz, 1H), 7.89-7.82 (m, 3H), 7.58 (t,  $J = 7.0$  Hz, 1H), 7.50 (t,  $J = 7.0$  Hz, 1H), 7.41 (t,  $J = 7.4$  Hz, 1H), 7.35-7.28 (m, 2H), 3.53 (s, 3H), 2.87-2.84 (m, 2H), 2.58 (t,  $J = 6.6$  Hz, 2H), 1.90-1.87 (m, 2H);  $^{13}\text{C NMR}$  (100 MHz,  $\text{CDCl}_3$ )  $\delta$  197.9, 151.7, 140.6, 138.7, 135.8, 135.2, 132.5, 130.2, 129.7, 129.4, 128.9, 128.4, 128.0, 127.9, 127.7, 126.5, 126.4, 125.0, 61.6, 30.4, 24.2, 21.1; IR (KBr)  $\nu$  2936, 1666, 1467, 1353, 1290, 1177, 1121, 1050, 866  $\text{cm}^{-1}$ ; HRMS (EI) Calcd for  $\text{C}_{22}\text{H}_{19}\text{NO}_2$   $[\text{M}]^+$  329.1416, found 329.1417.

**(8-(Methoxyimino)-5,6,7,8-tetrahydronaphthalen-1-yl)(naphthalen-1-yl)methanone (4k)**

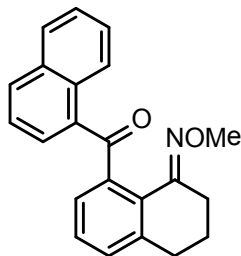

$R_f = 0.36$  (*n*-hexanes/EtOAc = 6:1);  $^1\text{H NMR}$  (400 MHz,  $\text{CDCl}_3$ )  $\delta$  9.22 (d,  $J = 8.6$  Hz, 1H), 7.89-7.96 (m, 2H), 7.67-7.71 (m, 1H), 7.56-7.59 (m, 1H), 7.28-7.48 (m, 5H), 3.35 (s, 3H), 2.78-2.81 (m, 2H), 2.46-2.50 (m, 2H), 1.79-1.85 (m, 2H);  $^{13}\text{C NMR}$  (100 MHz,  $\text{CDCl}_3$ )  $\delta$  199.3, 152.8, 141.0, 140.2, 135.5, 133.9, 132.7, 131.4, 129.7, 129.6, 129.5, 128.3, 128.2, 127.7, 127.6, 127.1, 126.2, 123.9, 61.6, 30.4, 24.4, 21.1; IR (KBr)  $\nu$  2937, 1646, 1591, 1437, 1309, 1249, 1152, 1074, 980, 883  $\text{cm}^{-1}$ ; HRMS (EI) Calcd for  $\text{C}_{22}\text{H}_{19}\text{NO}_2$   $[\text{M}]^+$  329.1416, found 329.1415.

**(2-Chlorophenyl)(8-(methoxyimino)-5,6,7,8-tetrahydronaphthalen-1-yl)methanone (4l)**

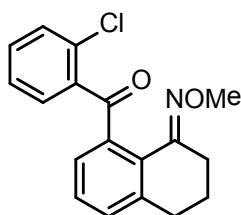

$R_f = 0.33$  (*n*-hexanes/EtOAc = 6:1);  $^1\text{H NMR}$  (400 MHz,  $\text{CDCl}_3$ )  $\delta$  7.48 (d,  $J = 7.8$  Hz, 1H), 7.81-7.42 (m, 5H), 7.20-7.23 (m, 1H), 3.77 (s, 3H), 2.74-2.77 (m, 2H), 2.52-2.55 (m, 2H), 1.81-1.86 (m, 2H);  $^{13}\text{C NMR}$  (125 MHz,  $\text{CDCl}_3$ )  $\delta$  195.6, 152.7, 140.9, 139.1, 137.0, 133.3, 131.9, 131.8, 131.2, 130.0, 129.7, 128.5, 127.6, 126.0, 61.9, 30.3, 24.4, 21.1; IR (KBr)  $\nu$  2937, 1676, 1587, 1472, 1351, 1294, 1160, 1051, 1004, 824  $\text{cm}^{-1}$ ; HRMS (EI) Calcd for  $\text{C}_{18}\text{H}_{16}\text{ClNO}_2$   $[\text{M}]^+$  313.0865, found 313.0874.

**(8-(Methoxyimino)-5,6,7,8-tetrahydronaphthalen-1-yl)(thiophen-2-yl)methanone (4m)**

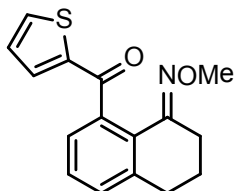

$R_f = 0.37$  (*n*-hexanes/EtOAc = 6:1);  $^1\text{H NMR}$  (400 MHz,  $\text{CDCl}_3$ )  $\delta$  7.59 (d,  $J = 4.8$  Hz, 1H), 7.22-7.36 (m, 4H), 7.01-7.03 (m, 1H), 3.68 (s, 3H), 2.79-2.82 (m, 2H), 2.63-2.66 (m, 2H), 1.86-1.91 (m, 2H);  $^{13}\text{C NMR}$  (100 MHz,  $\text{CDCl}_3$ )  $\delta$  190.4, 151.6, 145.8, 140.8, 138.3, 132.6,

132.5, 129.7, 128.6, 128.2, 127.5, 126.1, 61.7, 30.3, 24.3, 21.0; IR (KBr)  $\nu$  2936, 1652, 1459, 1355, 1289, 1155, 1048, 854  $\text{cm}^{-1}$ ; HRMS (EI) Calcd for  $\text{C}_{16}\text{H}_{15}\text{NO}_2\text{S}$   $[\text{M}]^+$  285.0824, found 285.0829.

### 2-Benzoylbenzaldehyde *O*-methyl oxime (6a)

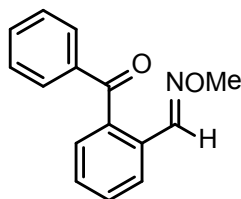

$R_f = 0.41$  (*n*-hexanes/EtOAc = 6:1);  $^1\text{H}$  NMR (400 MHz,  $\text{CDCl}_3$ )  $\delta$  8.17 (s, 1H), 7.93 (d,  $J = 7.8$  Hz, 1H), 7.80 (d,  $J = 7.7$  Hz, 2H), 7.47-7.61 (m, 6H), 3.88 (s, 3H);  $^{13}\text{C}$  NMR (100 MHz,  $\text{CDCl}_3$ )  $\delta$  197.0, 146.3, 138.3, 137.5, 133.3, 131.0, 130.5, 130.1, 129.0, 128.9, 128.5, 127.2, 62.0; IR (KBr)  $\nu$  2937, 1663, 1597, 1448, 1315, 1268, 1180, 1054, 1001, 846  $\text{cm}^{-1}$ ; HRMS (EI) Calcd for  $\text{C}_{15}\text{H}_{13}\text{NO}_2$   $[\text{M}]^+$  239.0946, found 239.0943.

### Methyl 3-benzoyl-4-((methoxyimino)methyl)benzoate (6b)

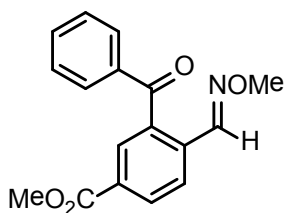

$R_f = 0.28$  (*n*-hexanes/EtOAc = 3:1);  $^1\text{H}$  NMR (400 MHz,  $\text{CDCl}_3$ )  $\delta$  8.13-8.14 (m, 1H), 8.05 (s, 1H), 7.98 (d,  $J = 8.2$  Hz, 1H), 7.75 (d,  $J = 7.8$  Hz, 1H), 7.56-7.60 (m, 1H), 7.42-7.46 (m, 2H), 3.89 (s, 3H), 3.86 (s, 3H);  $^{13}\text{C}$  NMR (100 MHz,  $\text{CDCl}_3$ )  $\delta$  196.1, 165.9, 145.5, 138.4, 137.0, 135.1, 133.6, 131.2, 130.4, 130.1, 130.0, 128.7, 127.3, 62.4, 52.4; IR (KBr)  $\nu$  2951, 1726, 1666, 1596, 1437, 1303, 1345, 1156, 1098, 1051, 860  $\text{cm}^{-1}$ ; HRMS (EI) Calcd for  $\text{C}_{17}\text{H}_{15}\text{NO}_4$   $[\text{M}]^+$  297.1001, found 297.0999.



SpinWorks 3: MY138-1H

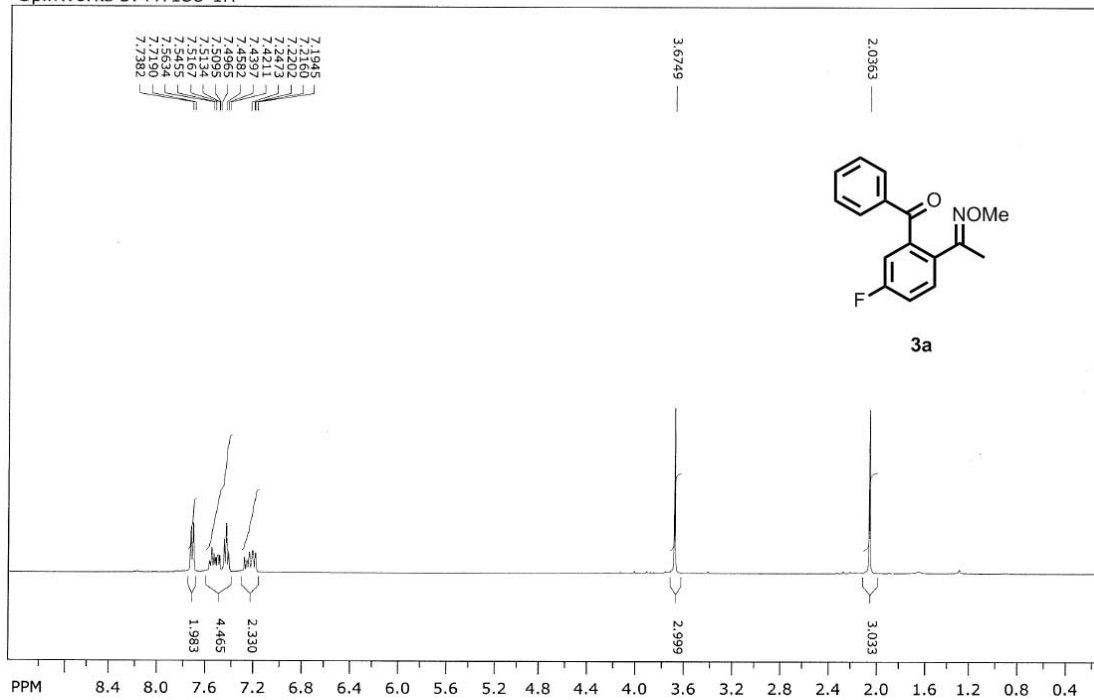

file: ... activation\SKK\_KIS (4)\192H\1\fid exp: <zg30>  
transmitter freq.: 400.131601 MHz  
time domain size: 65536 points  
width: 8012.82 Hz = 20.0255 ppm = 0.122266 Hz/pt  
number of scans: 16

freq. of 0 ppm: 400.130000 MHz  
processed size: 131072 complex points  
LB: 0.000 GF: 0.0000  
Hz/cm: 146.974 ppm/cm: 0.36731

SpinWorks 3: MY138-13C

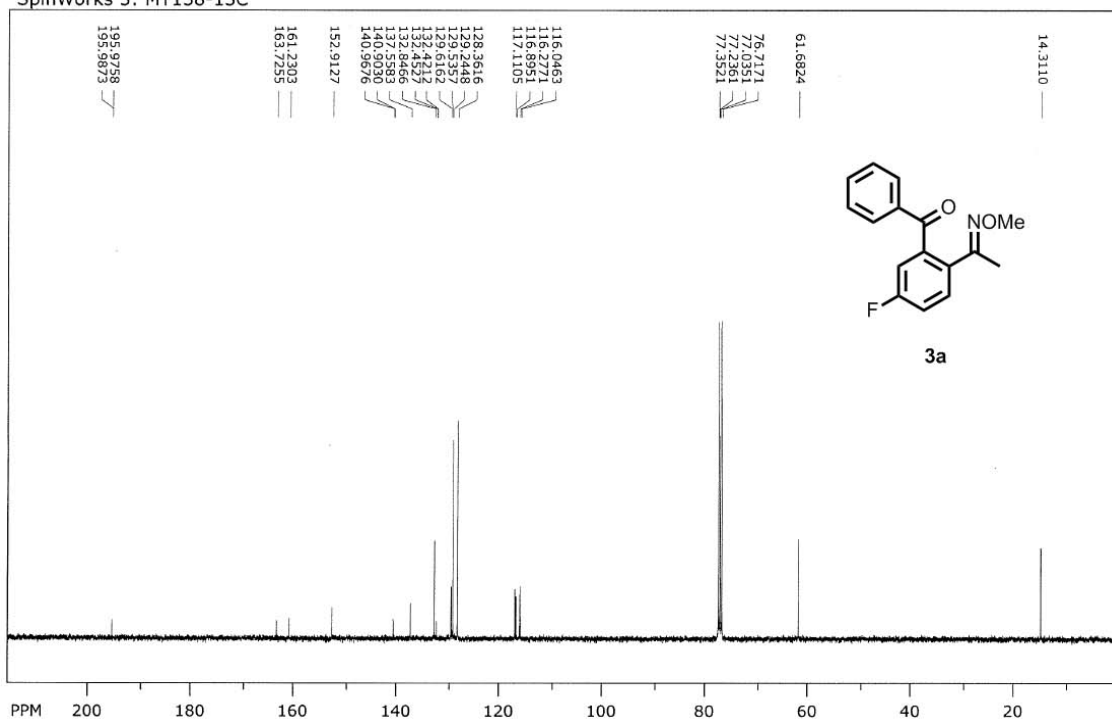

file: ... activation\SKK\_KIS (4)\192C\1\fid exp: <zgpg30>  
transmitter freq.: 100.622829 MHz  
time domain size: 65536 points  
width: 24038.46 Hz = 238.8967 ppm = 0.366798 Hz/pt

freq. of 0 ppm: 100.612769 MHz  
processed size: 32768 complex points  
LB: 0.000 GF: 0.0000  
Hz/cm: 876.620 ppm/cm: 8.71194

SpinWorks 3: MY.157(1)-1H

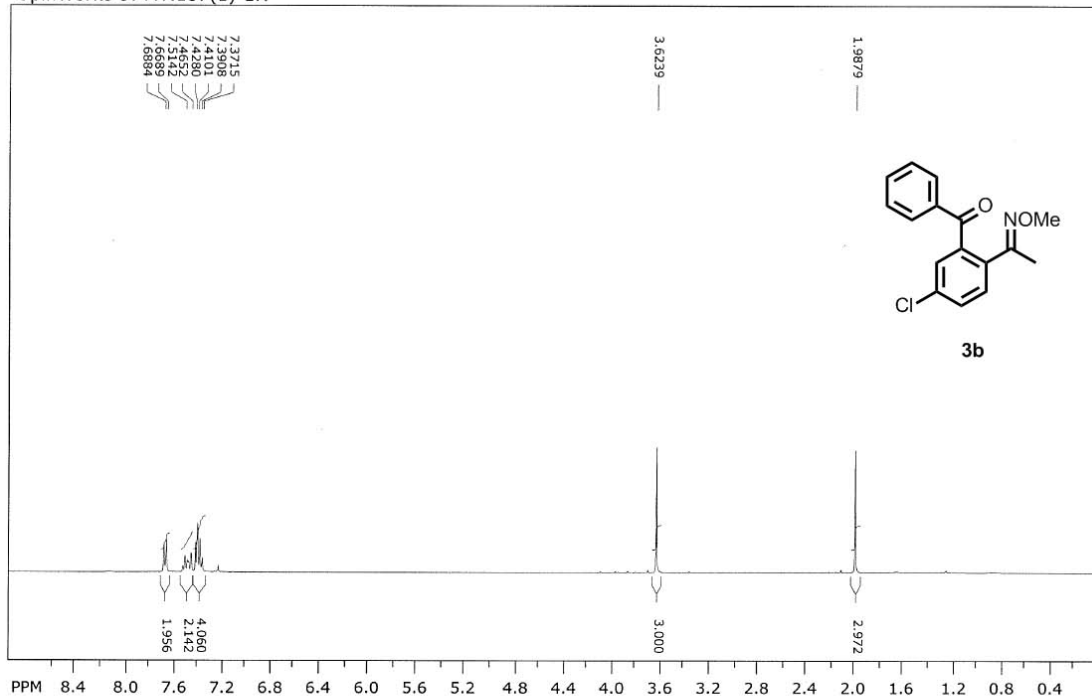

file: ... activation\SKK\_KIS (3)\211H\1\fid exp: <zg30>  
transmitter freq.: 400.131601 MHz  
time domain size: 65536 points  
width: 8012.82 Hz = 20.0255 ppm = 0.122266 Hz/pt  
number of scans: 16

freq. of 0 ppm: 400.130019 MHz  
processed size: 131072 complex points  
LB: 0.000 GF: 0.0000  
Hz/cm: 143.926 ppm/cm: 0.35970

SpinWorks 3: MY157(1)-13C.jpg

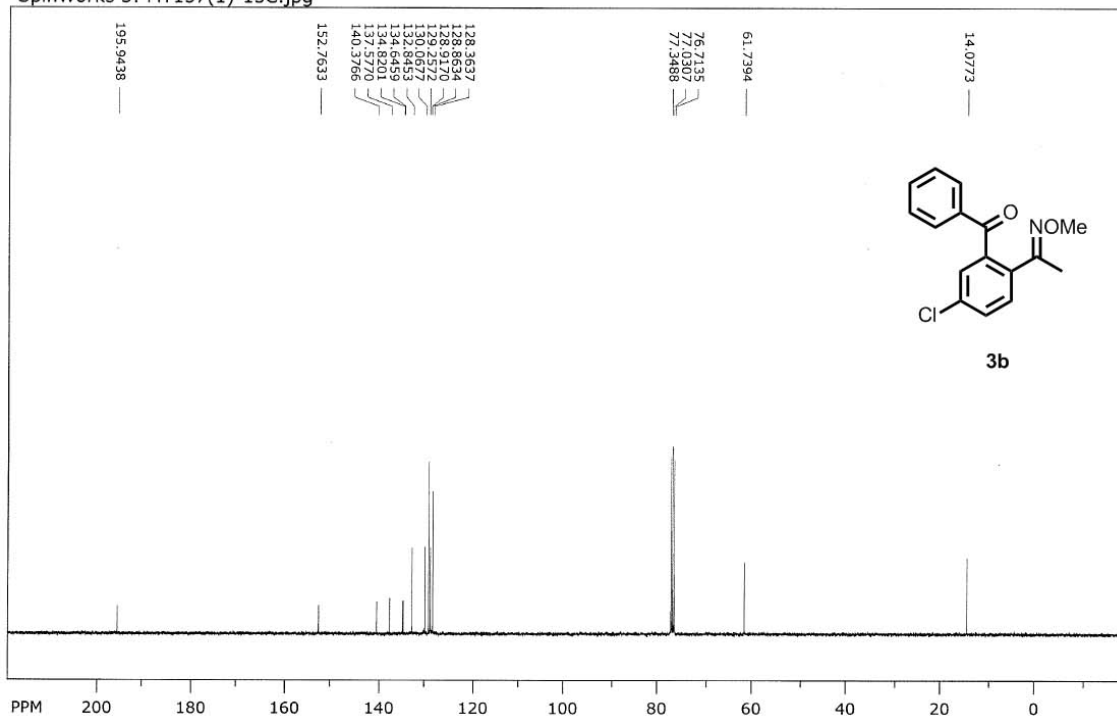

file: ... activation\SKK\_KIS (3)\211C\1\fid exp: <zgpg30>  
transmitter freq.: 100.622829 MHz  
time domain size: 65536 points  
width: 24038.46 Hz = 238.8967 ppm = 0.366798 Hz/pt

freq. of 0 ppm: 100.612769 MHz  
processed size: 32768 complex points  
LB: 0.000 GF: 0.0000  
Hz/cm: 961.538 ppm/cm: 9.55587



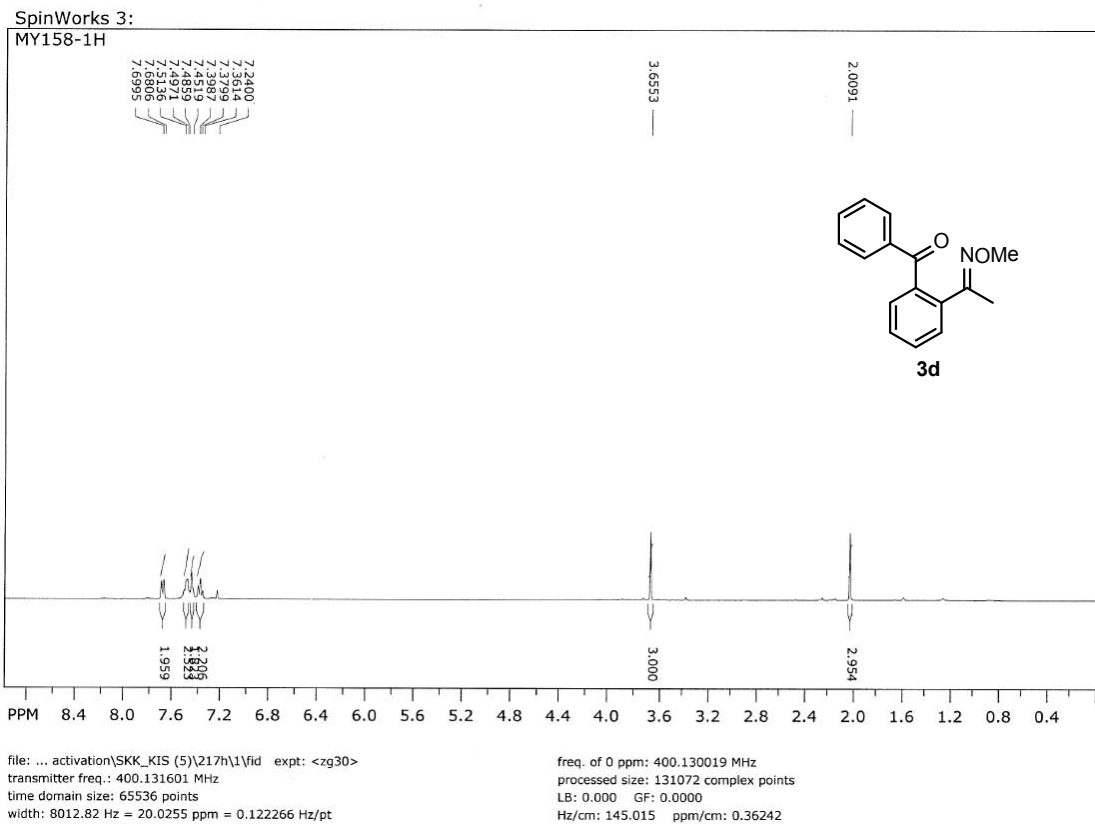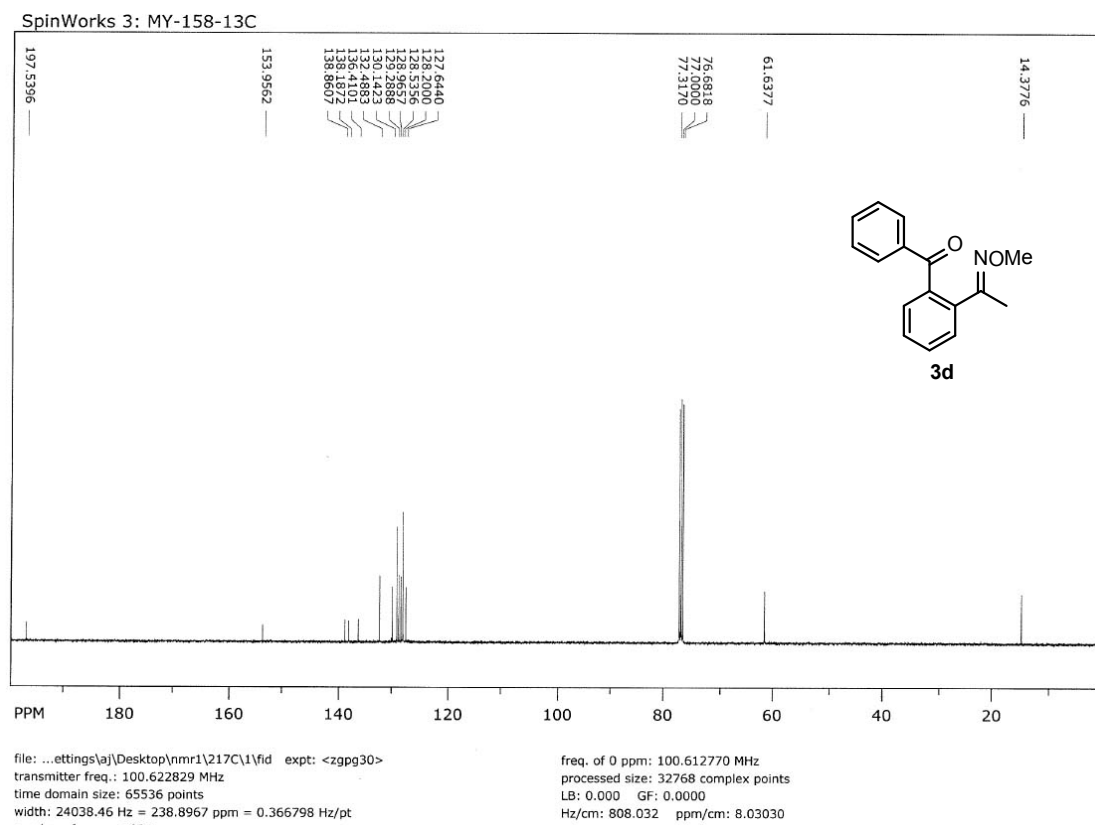

SpinWorks 3: MY136-1H

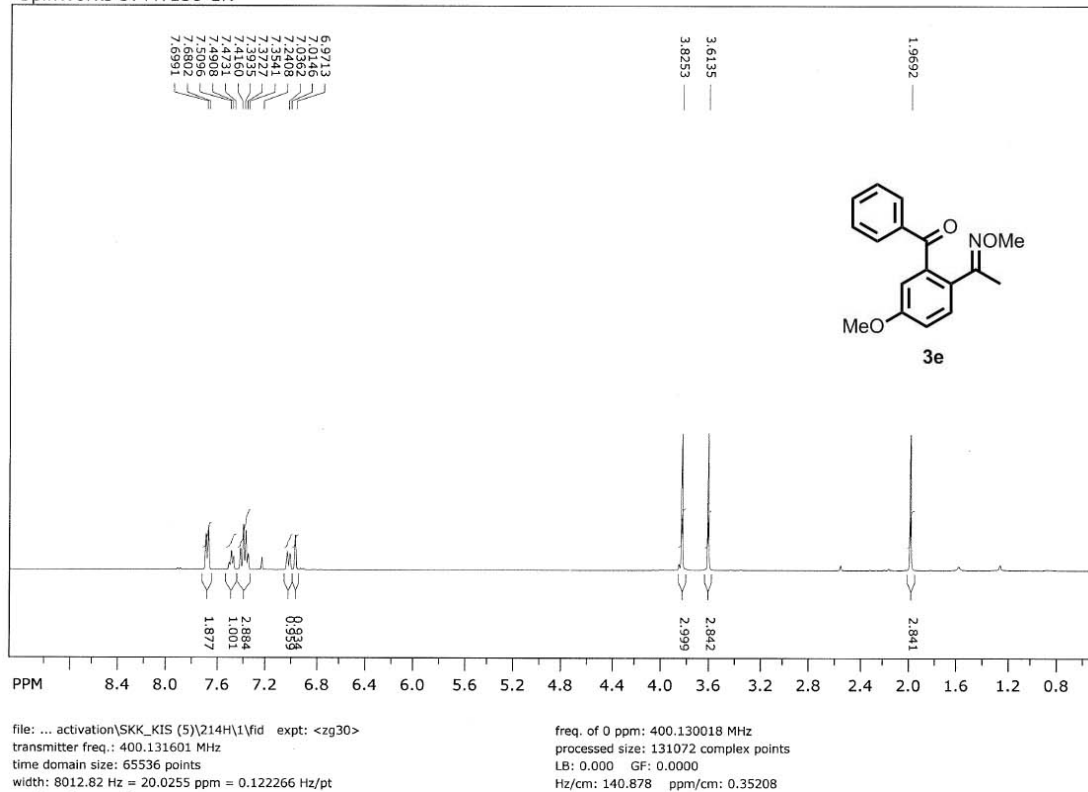

SpinWorks 3: MY-136-13C

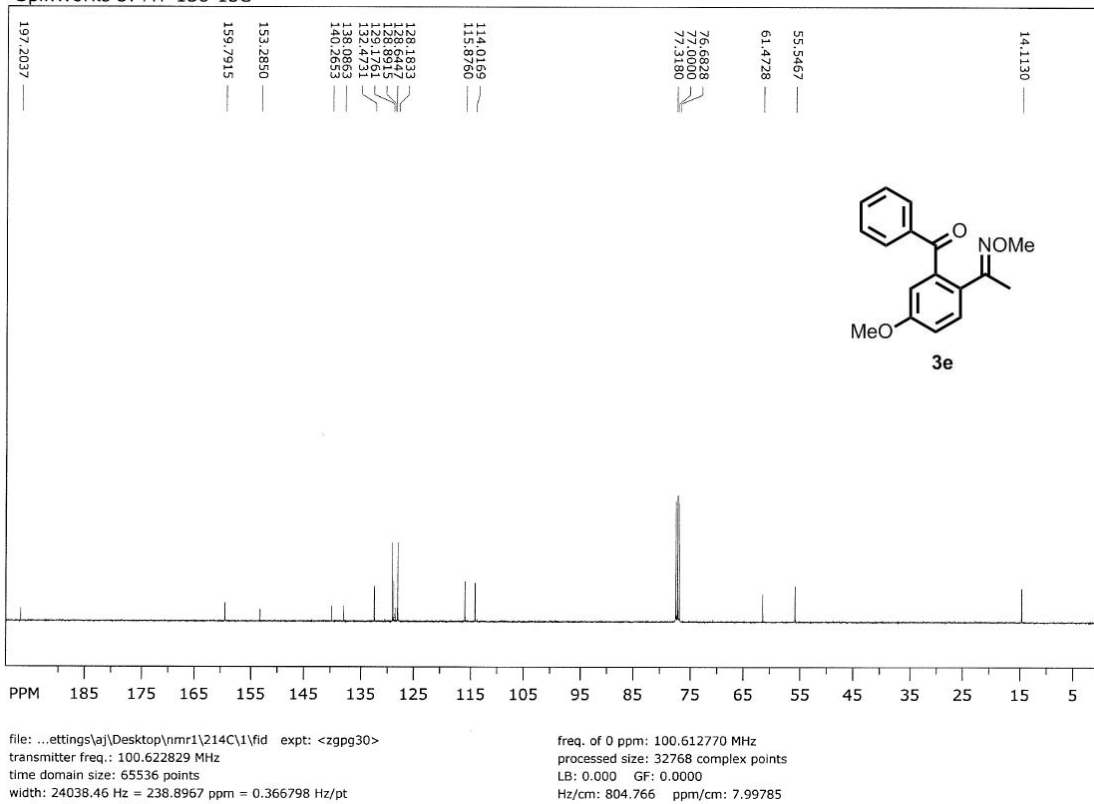

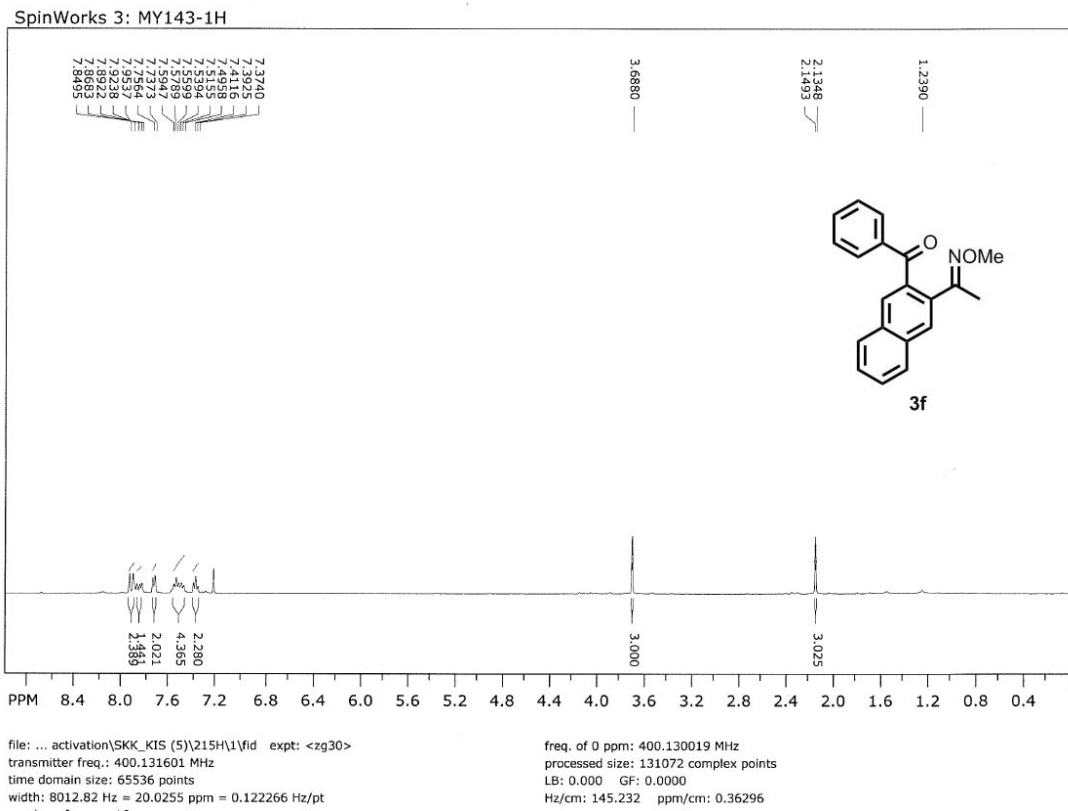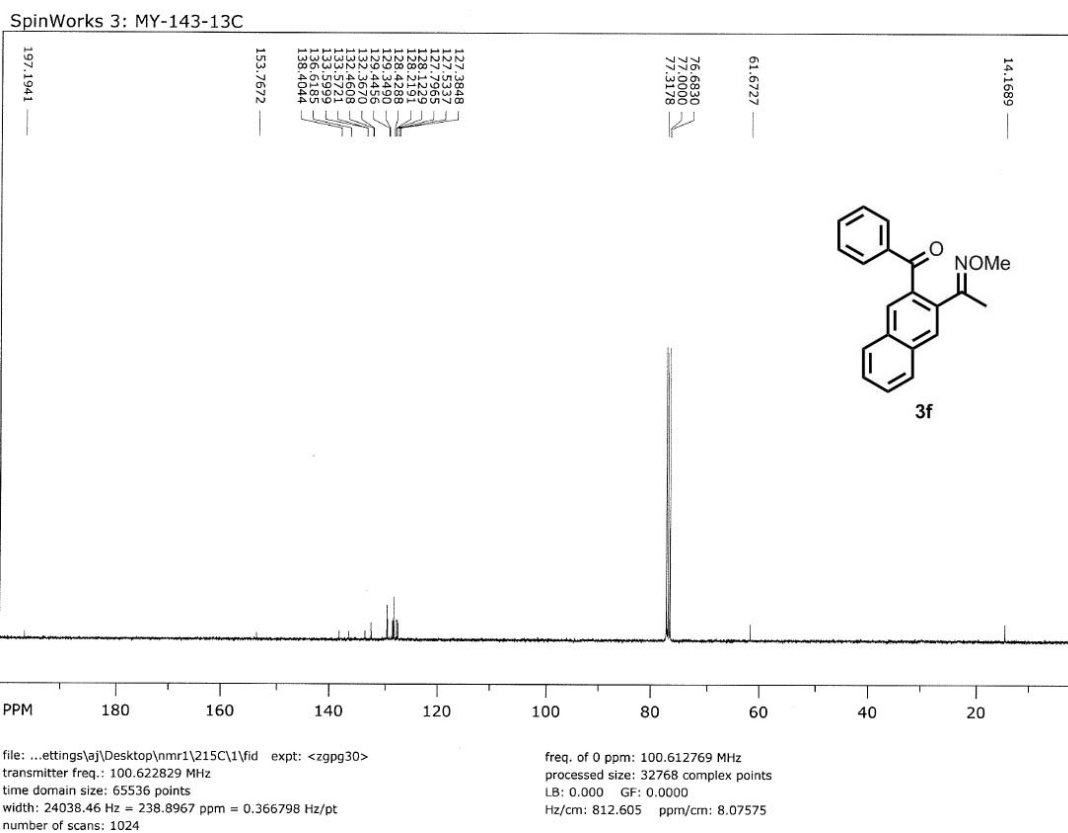

SpinWorks 3: MY141(1)-1H

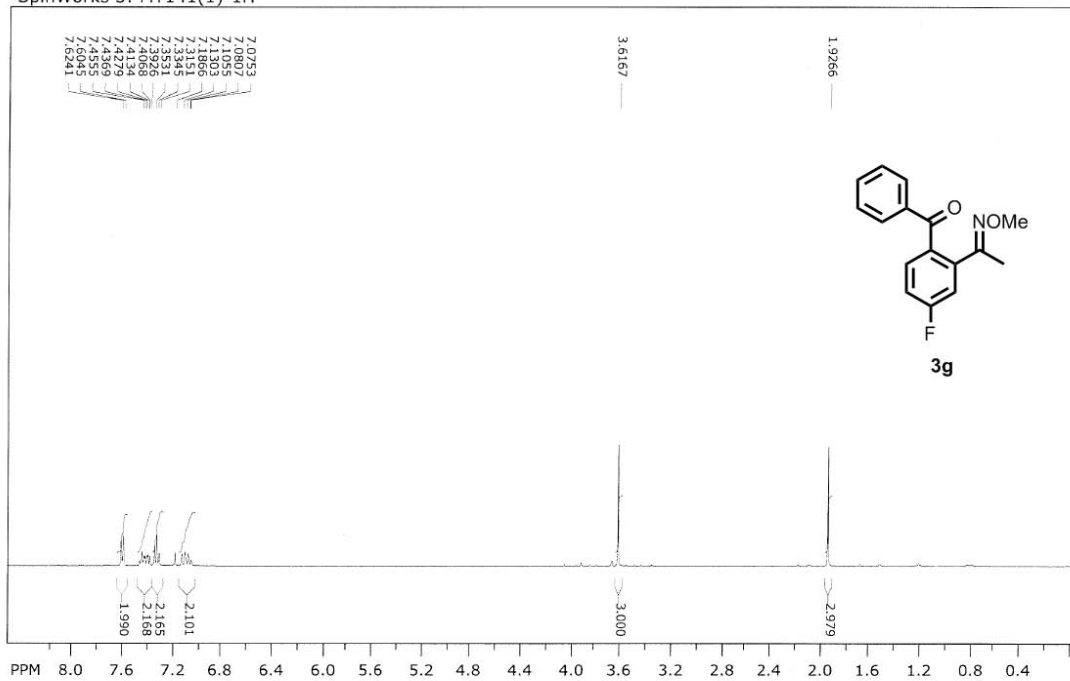

file: ...s\PC\바탕 화면\SKK\_KIS\_1116\196h\1\fid exp: <zg30>  
transmitter freq.: 400.131601 MHz  
time domain size: 65536 points  
width: 8012.82 Hz = 20.0255 ppm = 0.122266 Hz/pt  
number of scans: 16

freq. of 0 ppm: 400.130040 MHz  
processed size: 131072 complex points  
LB: 0.000 GF: 0.0000  
Hz/cm: 137.720 ppm/cm: 0.34419

SpinWorks 3: MY141(1)-13C

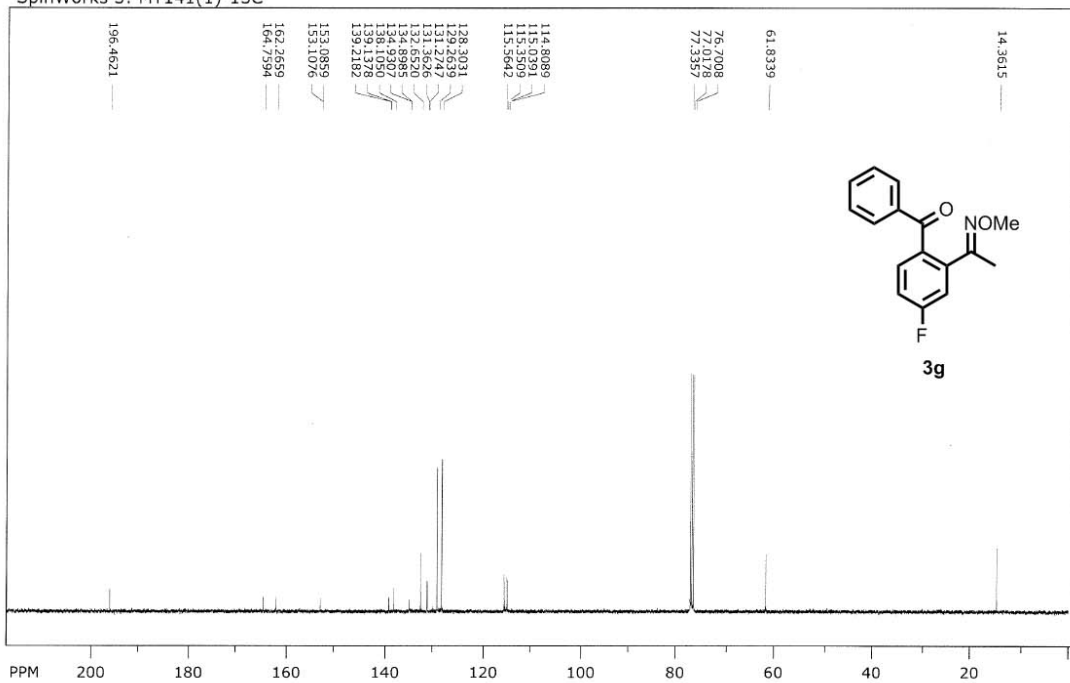

file: ...s\PC\바탕 화면\SKK\_KIS\_1116\196c\1\fid exp: <zpgg30>  
transmitter freq.: 100.622829 MHz  
time domain size: 65536 points  
width: 24038.46 Hz = 238.8967 ppm = 0.366798 Hz/pt  
number of scans: 256

freq. of 0 ppm: 100.612769 MHz  
processed size: 32768 complex points  
LB: 0.000 GF: 0.0000  
Hz/cm: 877.833 ppm/cm: 8.72400

SpinWorks 3: MY141(2)

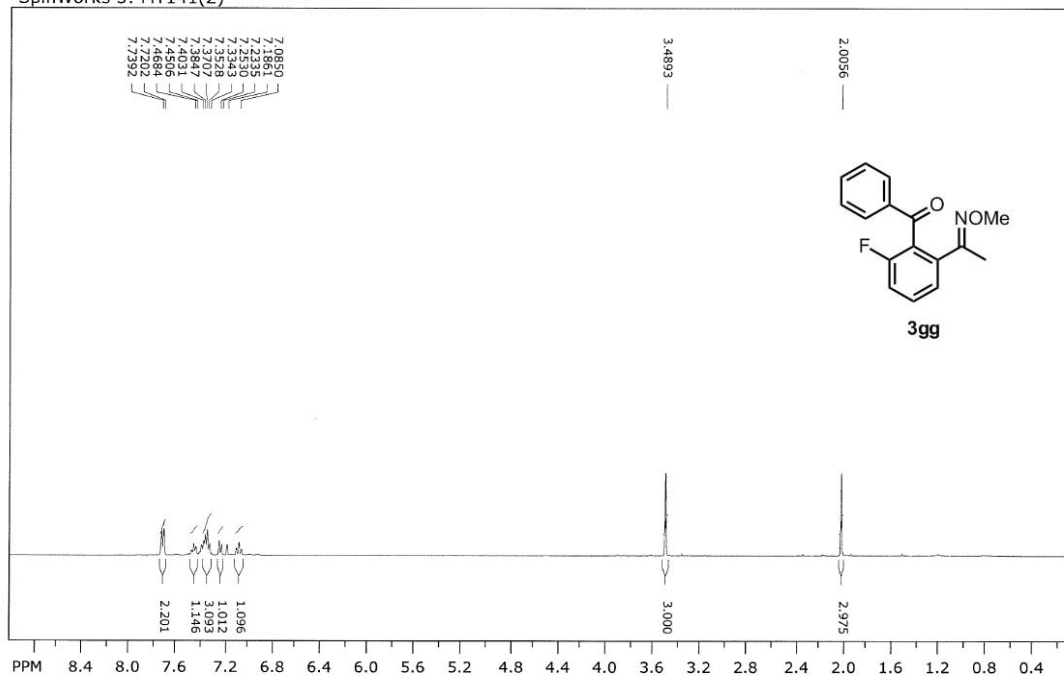

file: ...activation\SKK\_KIS (5)\216H\1\fid expt: <zg30>  
transmitter freq.: 400.131601 MHz  
time domain size: 65536 points  
width: 8012.82 Hz = 20.0255 ppm = 0.122266 Hz/pt  
number of scans: 16

freq. of 0 ppm: 400.130040 MHz  
processed size: 131072 complex points  
LB: 0.000 GF: 0.0000  
Hz/cm: 143.273 ppm/cm: 0.35806

SpinWorks 3:

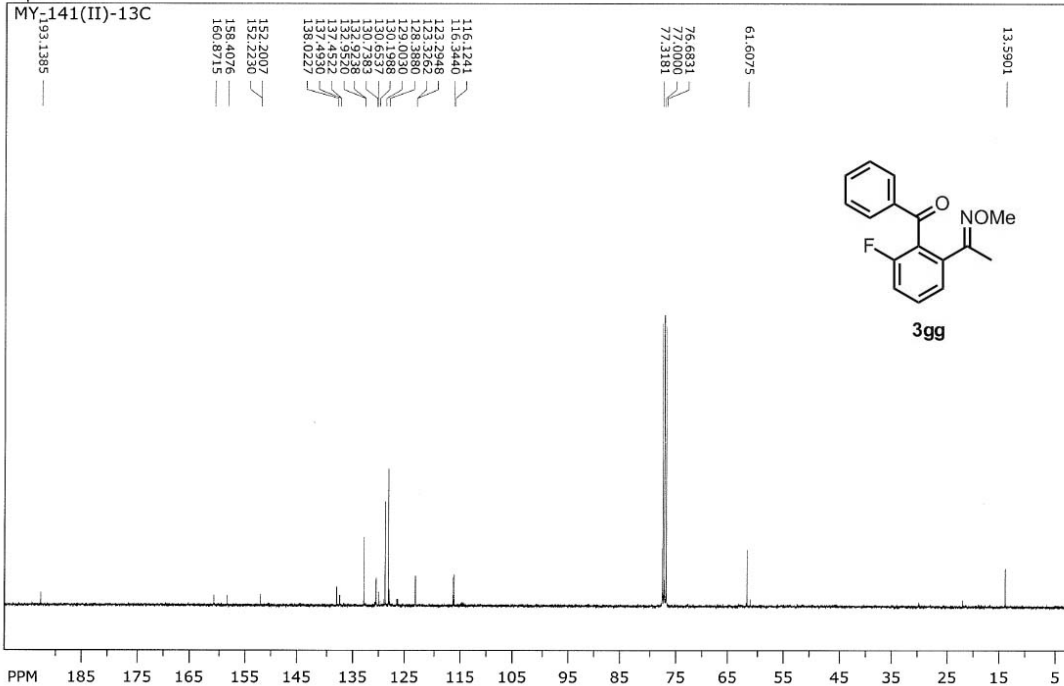

file: ...ettings\aj\Desktop\nmr1\216C\1\fid expt: <zggg30>  
transmitter freq.: 100.622829 MHz  
time domain size: 65536 points  
width: 24038.46 Hz = 238.8967 ppm = 0.366798 Hz/pt  
number of scans: 1024

freq. of 0 ppm: 100.612769 MHz  
processed size: 32768 complex points  
LB: 0.000 GF: 0.0000  
Hz/cm: 803.459 ppm/cm: 7.98486



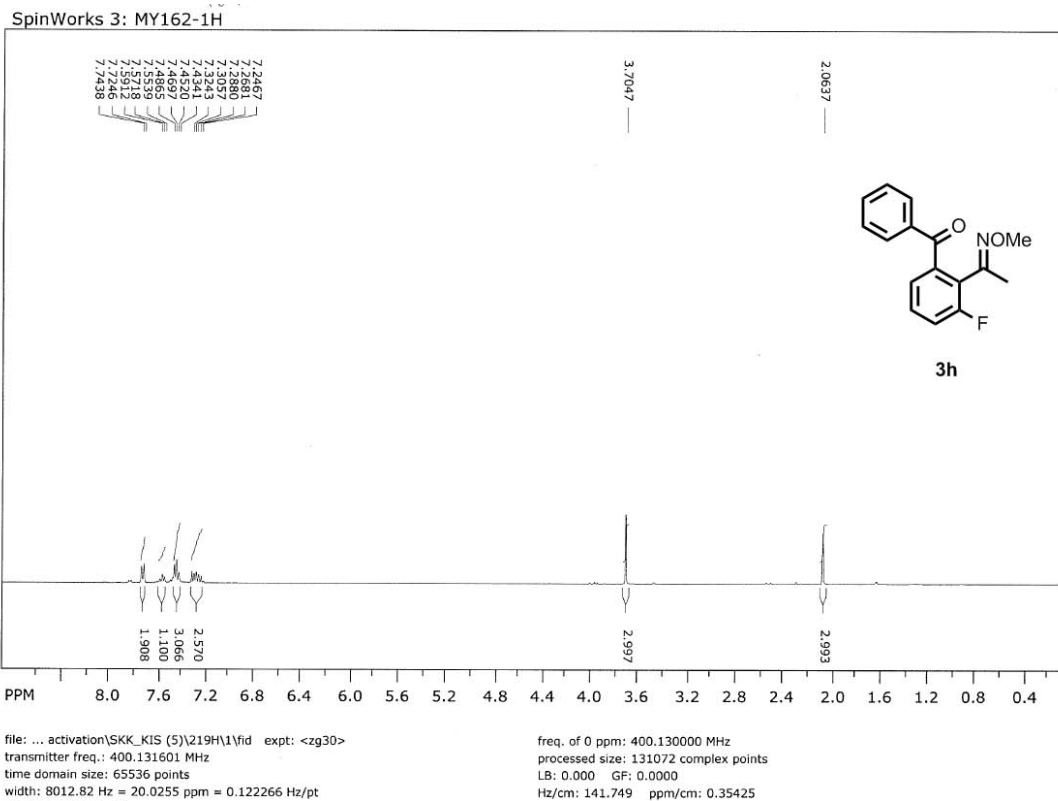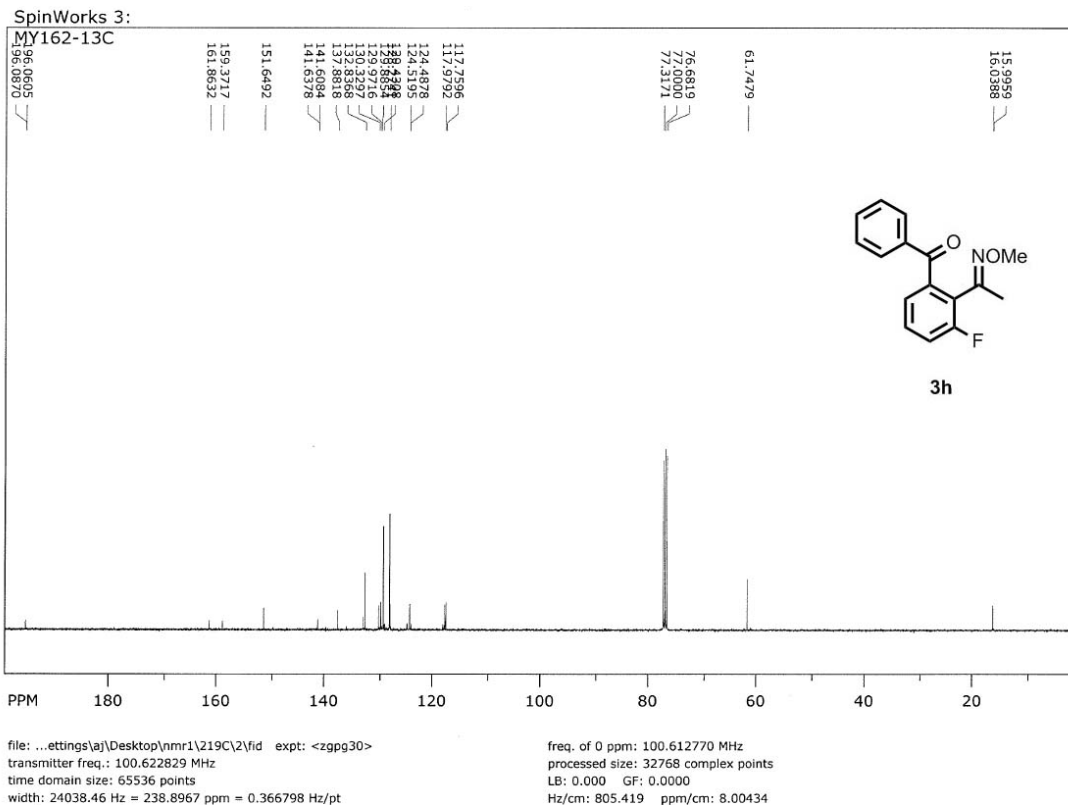

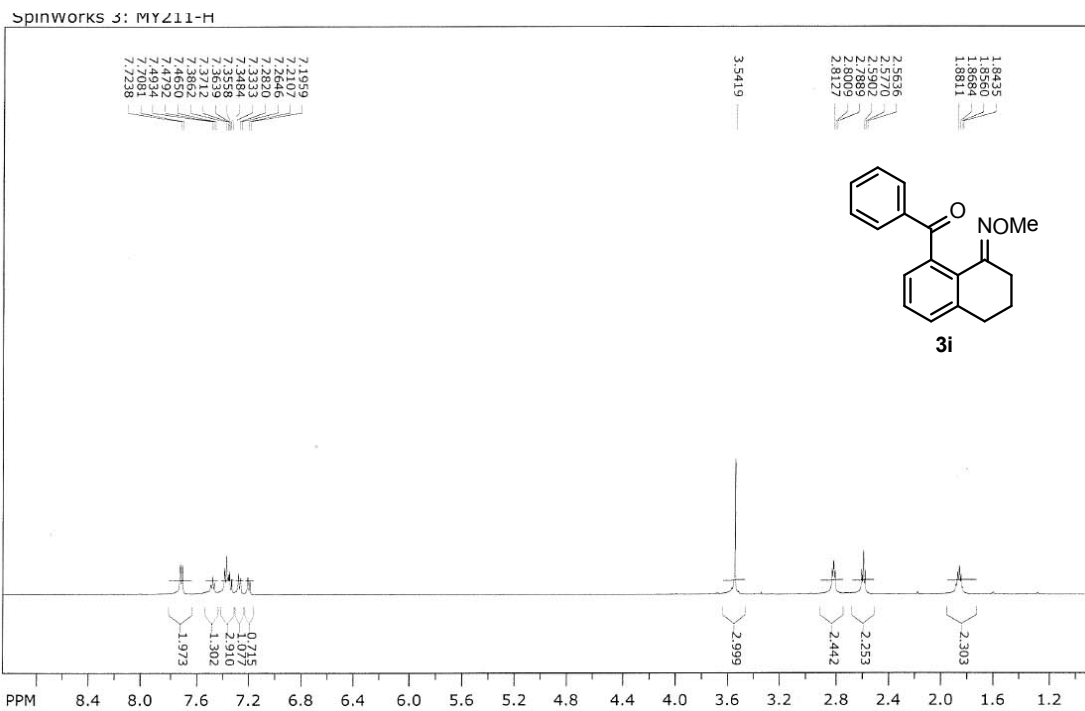

file: F:\MY211-H.fid\fid\_block# 1 expt: "s2pul"  
 transmitter freq.: 499.960210 MHz  
 time domain size: 36372 points  
 width: 9611.92 Hz = 19.2254 ppm = 0.264267 Hz/pt  
 SpinWorks 3: MY211

freq. of 0 ppm: 499.957020 MHz  
 processed size: 65536 complex points  
 LB: 0.000 GF: 0.0000  
 Hz/cm: 163.274 ppm/cm: 0.32657

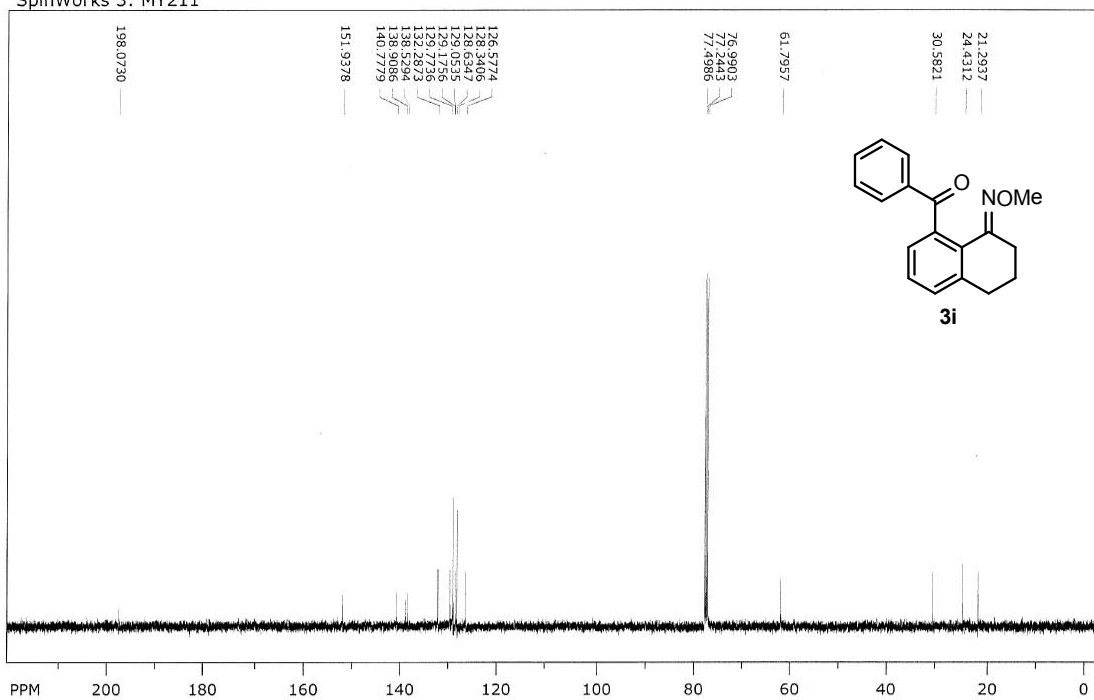

file: F:\MY211.fid\fid\_block# 1 expt: "s2pul"  
 transmitter freq.: 125.728913 MHz  
 time domain size: 94624 points  
 width: 36363.64 Hz = 289.2225 ppm = 0.384296 Hz/pt

freq. of 0 ppm: 125.714263 MHz  
 processed size: 131072 complex points  
 LB: 0.000 GF: 0.0000  
 Hz/cm: 1129.058 ppm/cm: 8.98010

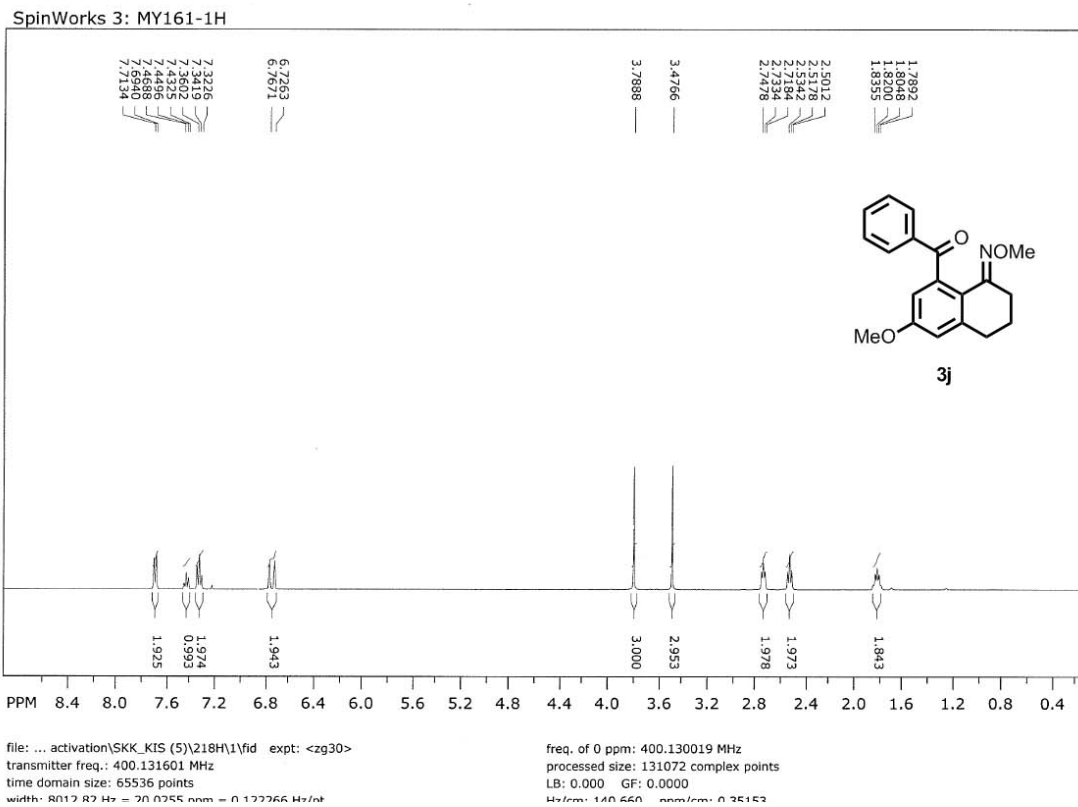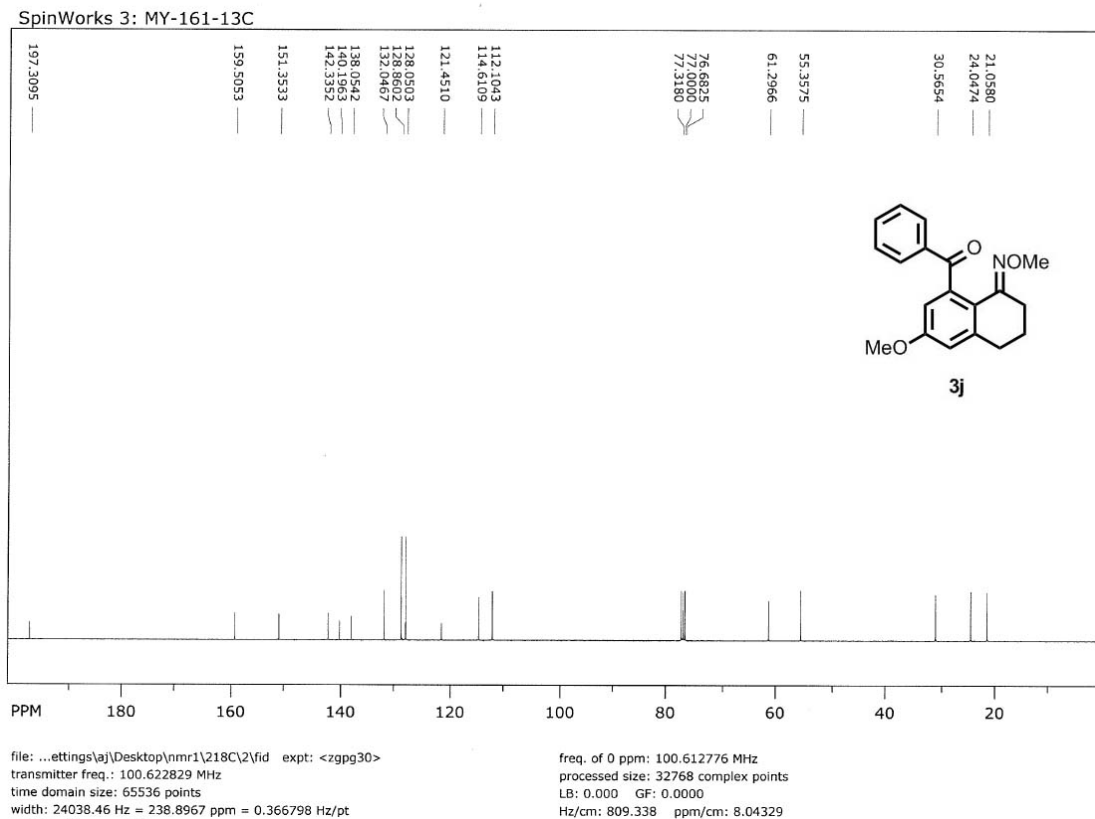



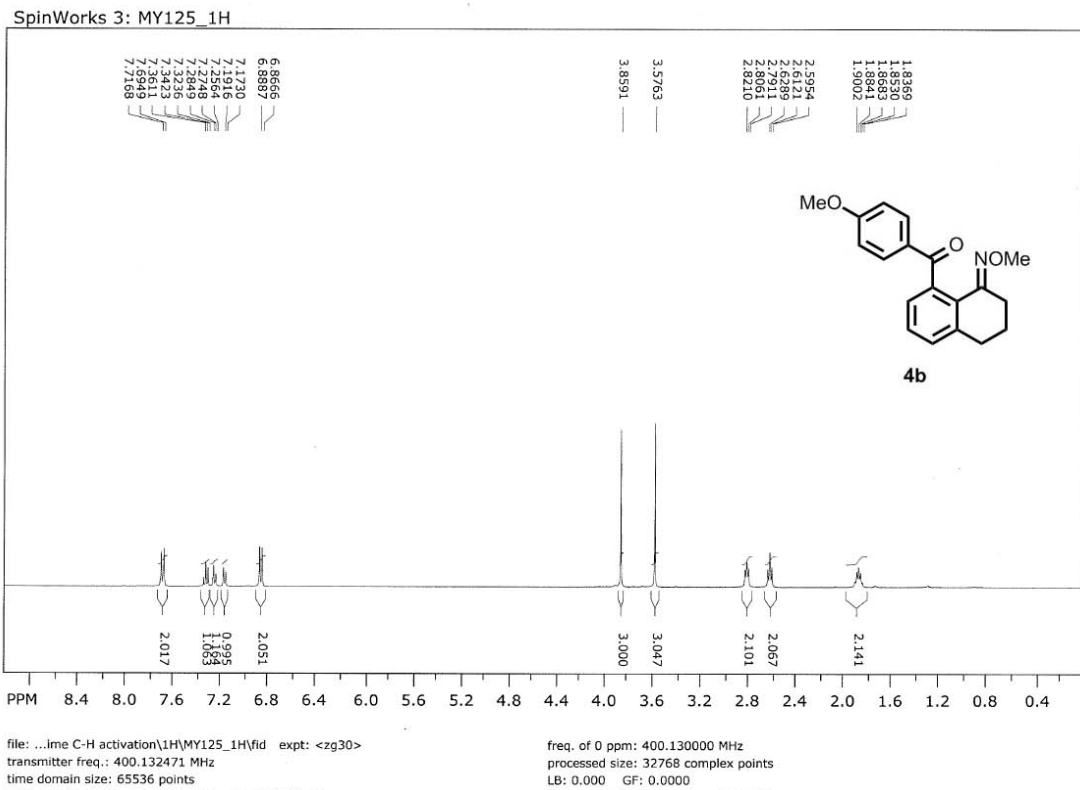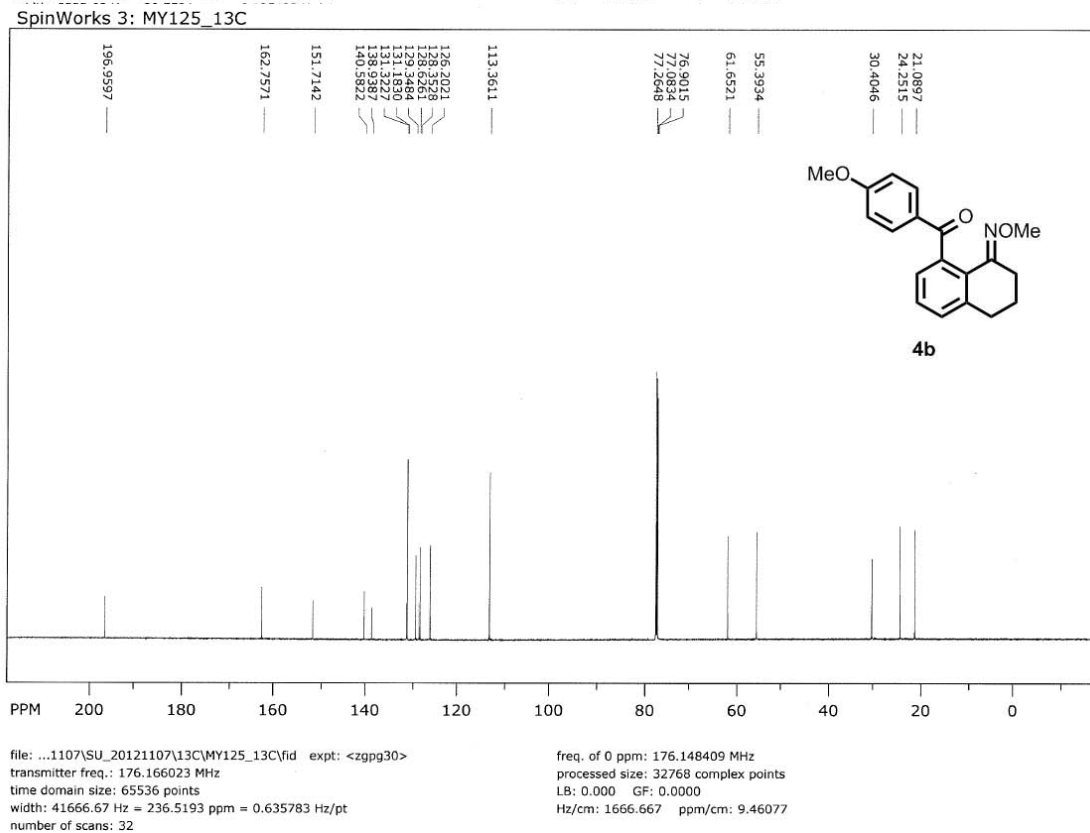

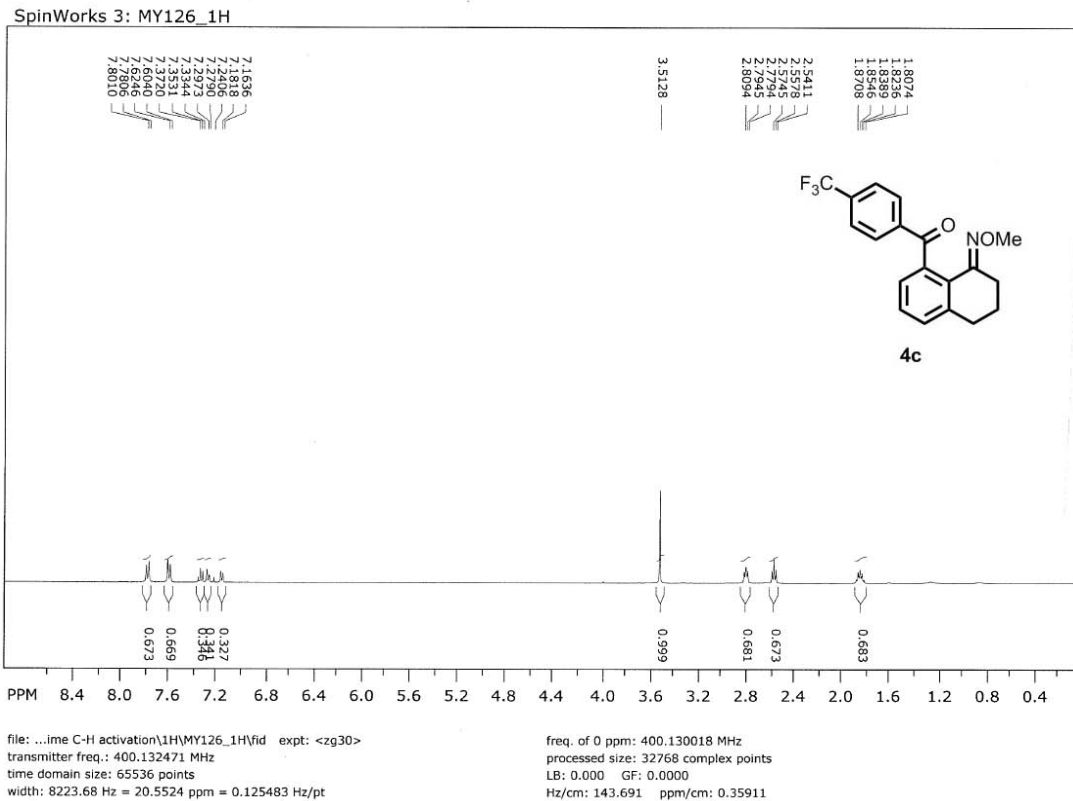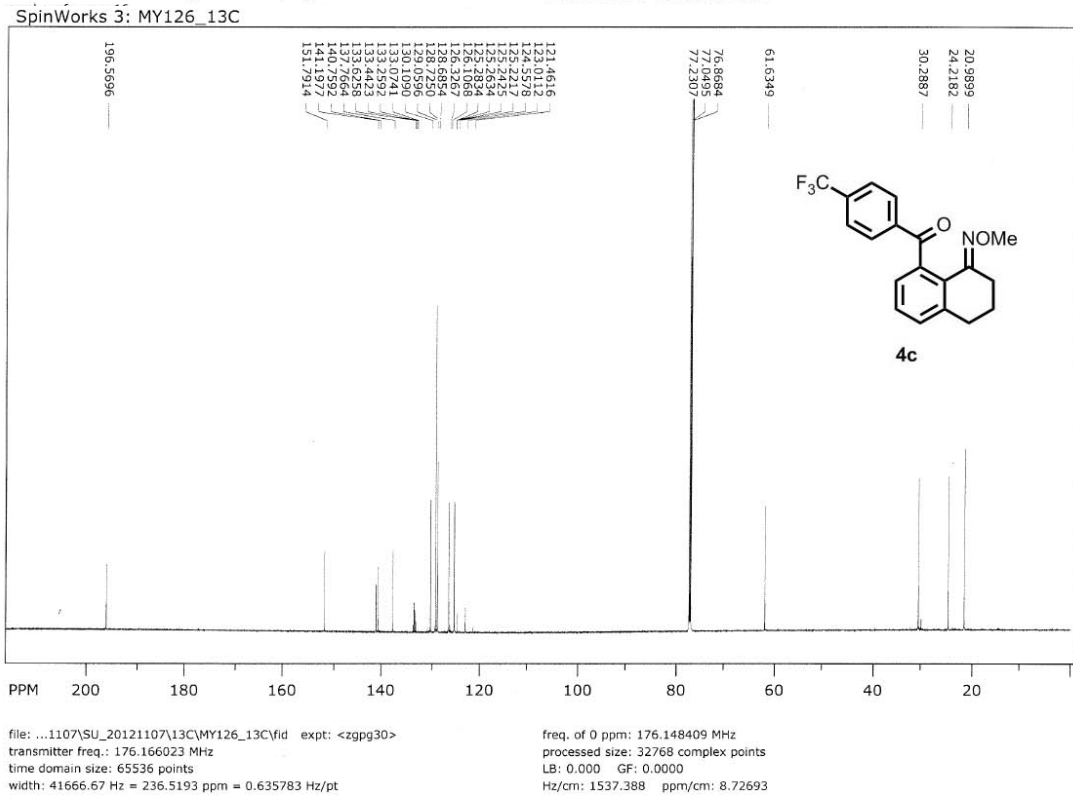

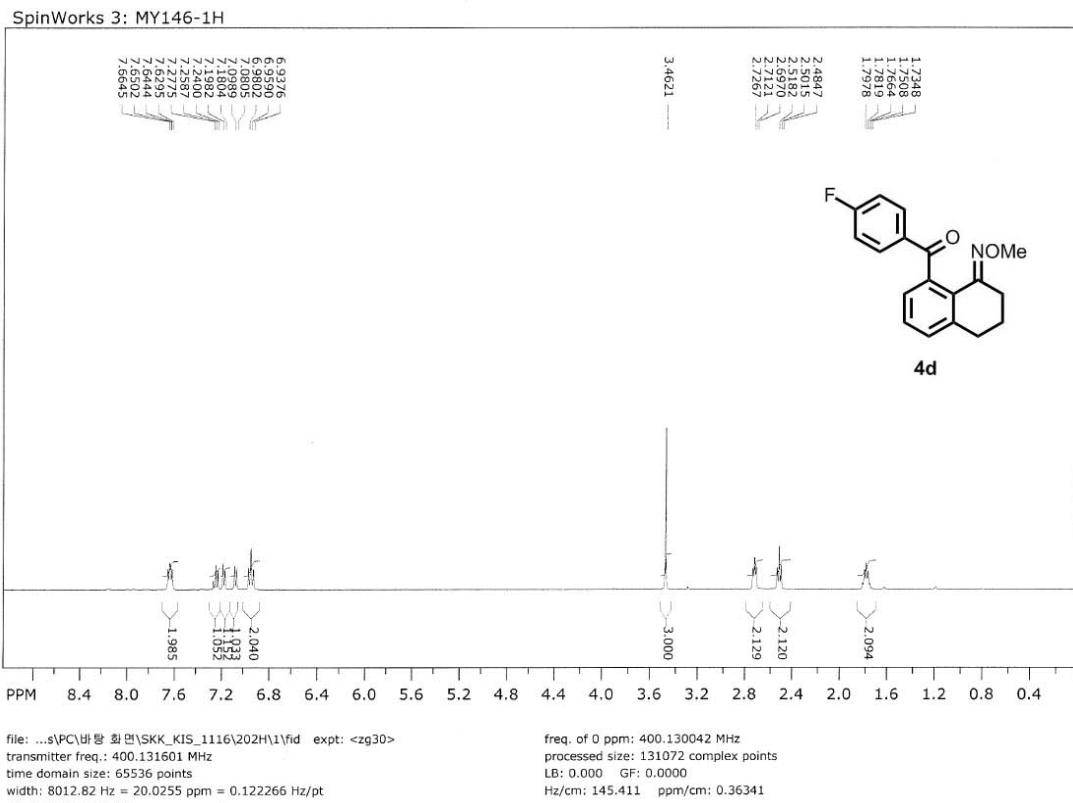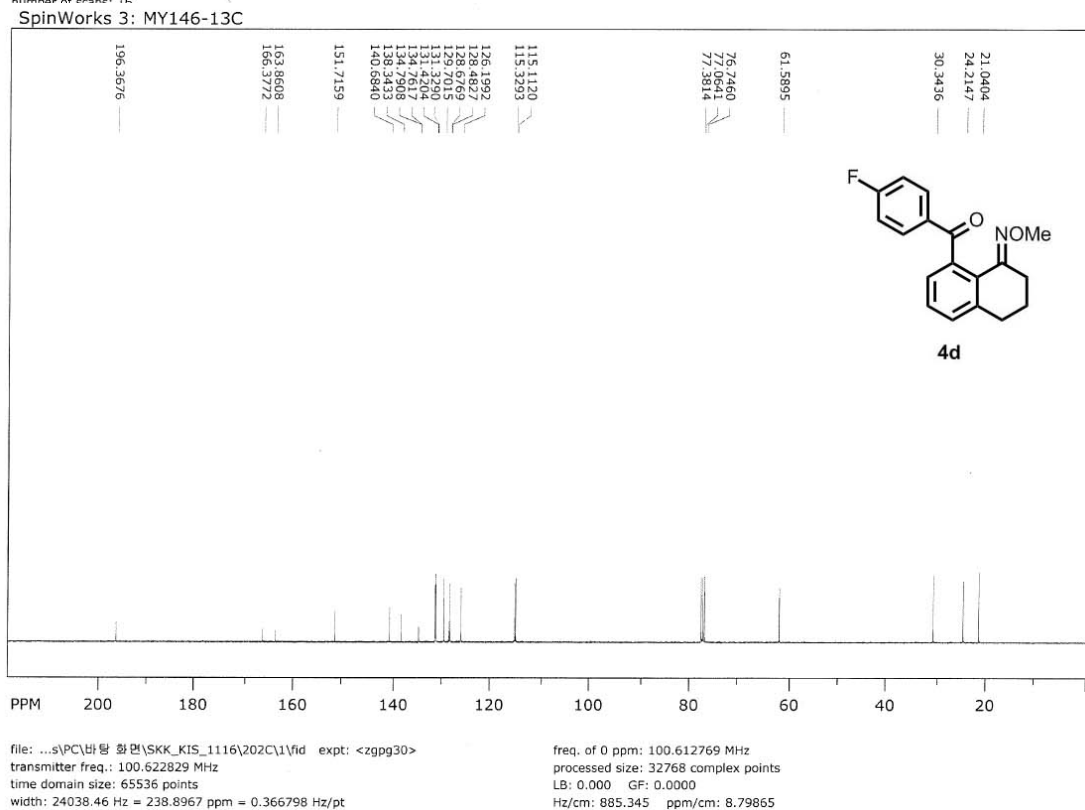

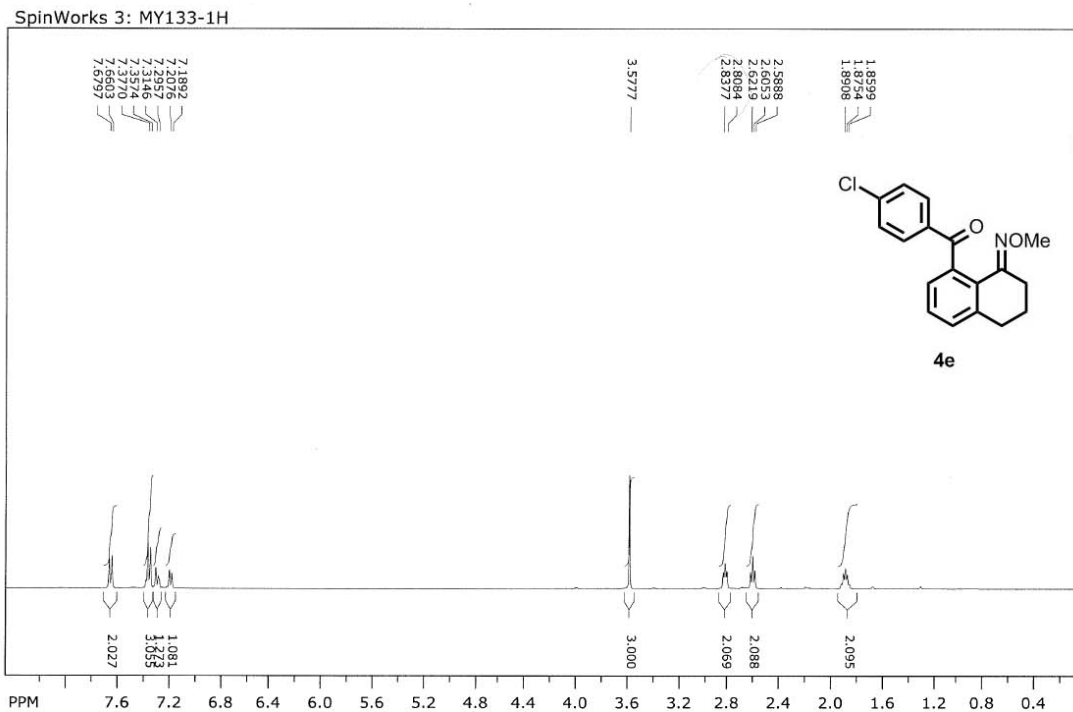

file: ... activation\SKK\_KIS (4)\189H\1\fid exp: <zg30>  
transmitter freq.: 400.131601 MHz  
time domain size: 65536 points  
width: 8012.82 Hz = 20.0255 ppm = 0.122266 Hz/pt  
number of scans: 16  
SpinWorks 3: MY133-13C

freq. of 0 ppm: 400.130000 MHz  
processed size: 131072 complex points  
LB: 0.000 GF: 0.0000  
Hz/cm: 135.870 ppm/cm: 0.33956

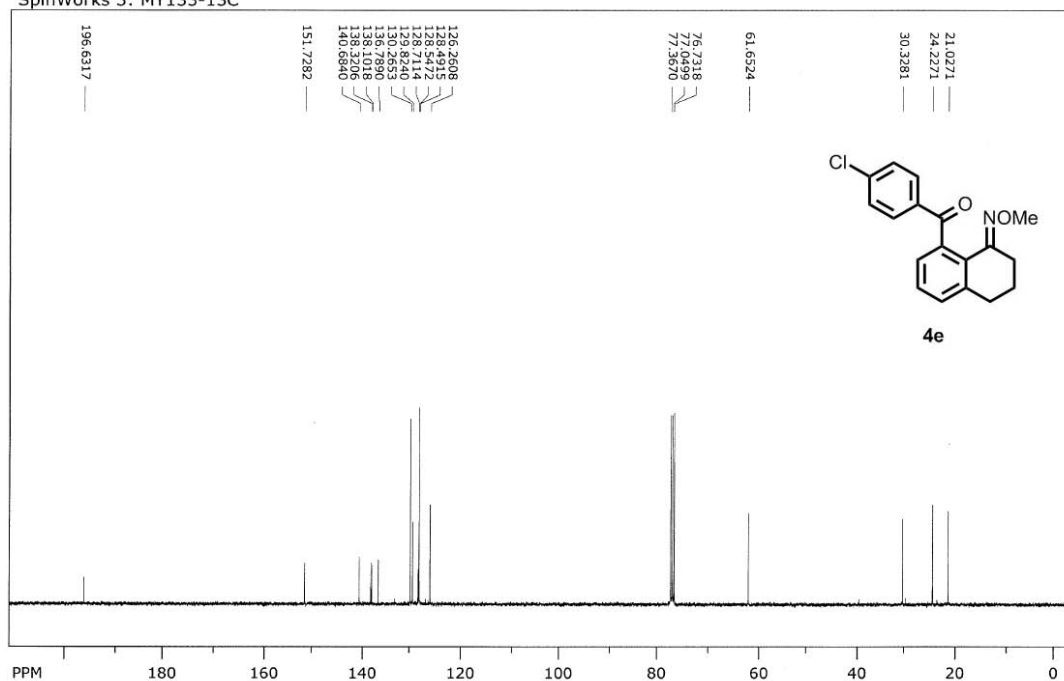

file: ... activation\SKK\_KIS (4)\189C\1\fid exp: <zpg30>  
transmitter freq.: 100.622829 MHz  
time domain size: 65536 points  
width: 24038.46 Hz = 238.8967 ppm = 0.366798 Hz/pt

freq. of 0 ppm: 100.612769 MHz  
processed size: 32768 complex points  
LB: 0.000 GF: 0.0000  
Hz/cm: 867.475 ppm/cm: 8.62105



SpinWorks 3: MY134-1H

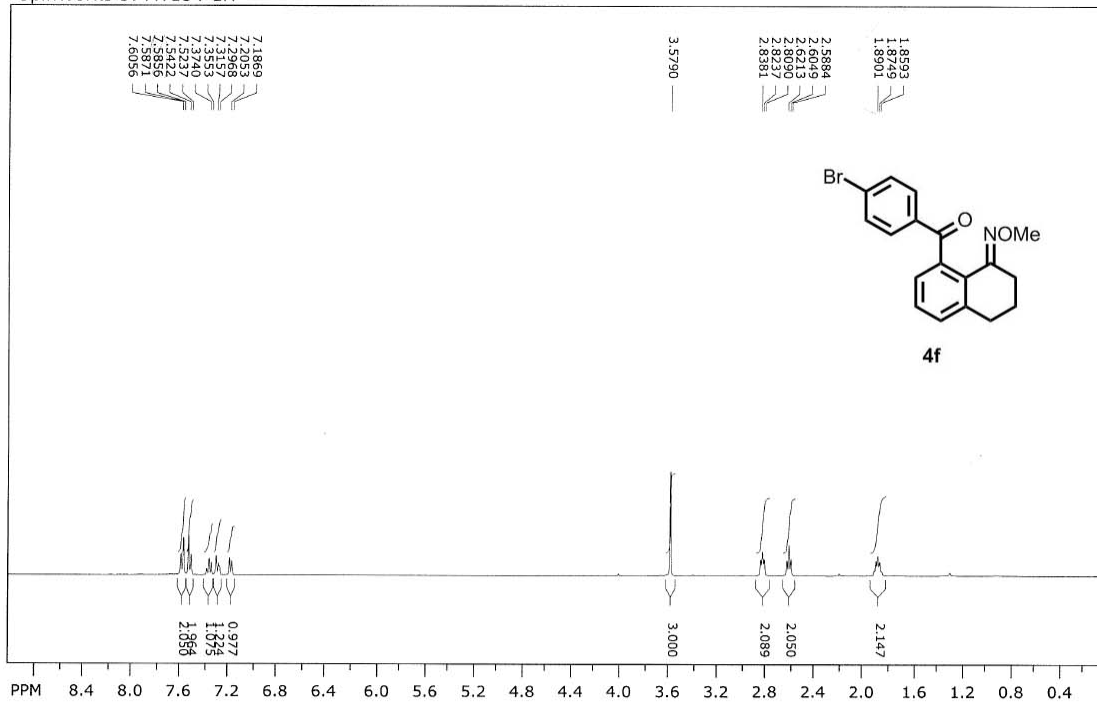

file: ... activation\SKK\_KIS (4)\190H\1\fid exp: <zg30>  
 transmitter freq.: 400.131601 MHz  
 time domain size: 65536 points  
 width: 8012.82 Hz = 20.0255 ppm = 0.122266 Hz/pt

freq. of 0 ppm: 400.130000 MHz  
 processed size: 131072 complex points  
 LB: 0.000 GF: 0.0000  
 Hz/cm: 144.361 ppm/cm: 0.36078

SpinWorks 3: MY134-13C

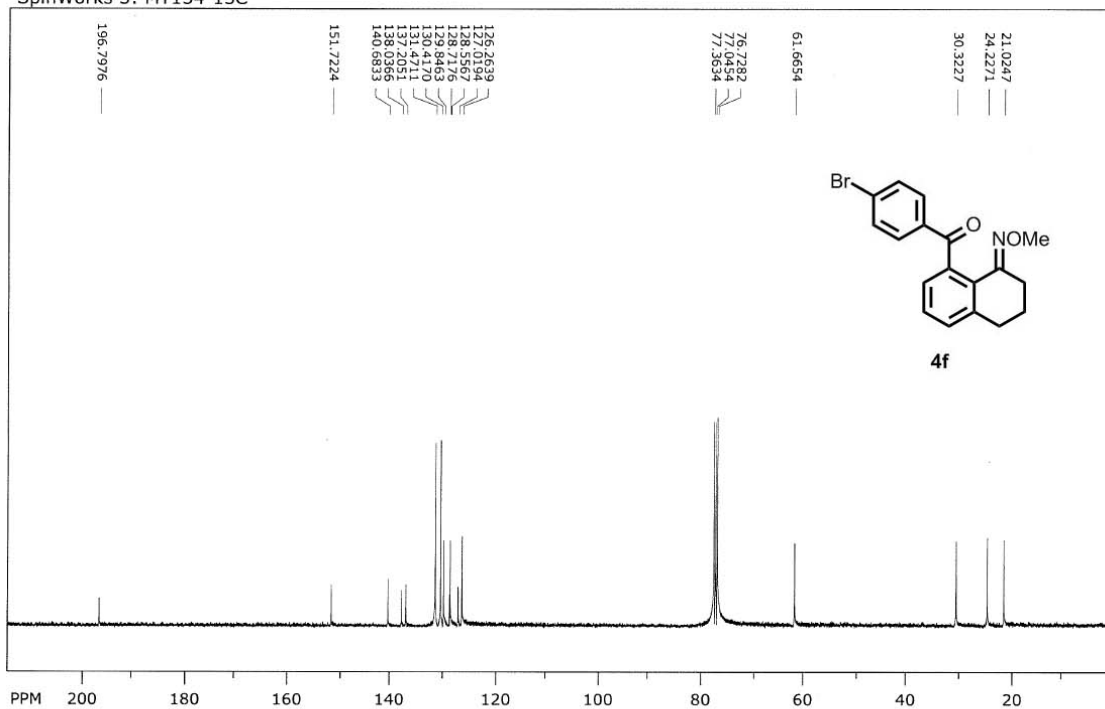

file: ... activation\SKK\_KIS (4)\190C\1\fid exp: <zgpg30>  
 transmitter freq.: 100.622829 MHz  
 time domain size: 65536 points  
 width: 24038.46 Hz = 238.8967 ppm = 0.366798 Hz/pt  
 number of scans: 256

freq. of 0 ppm: 100.612769 MHz  
 processed size: 32768 complex points  
 LB: 0.000 GF: 0.0000  
 Hz/cm: 866.168 ppm/cm: 8.60807



SpinWorks 3: MY148-1H

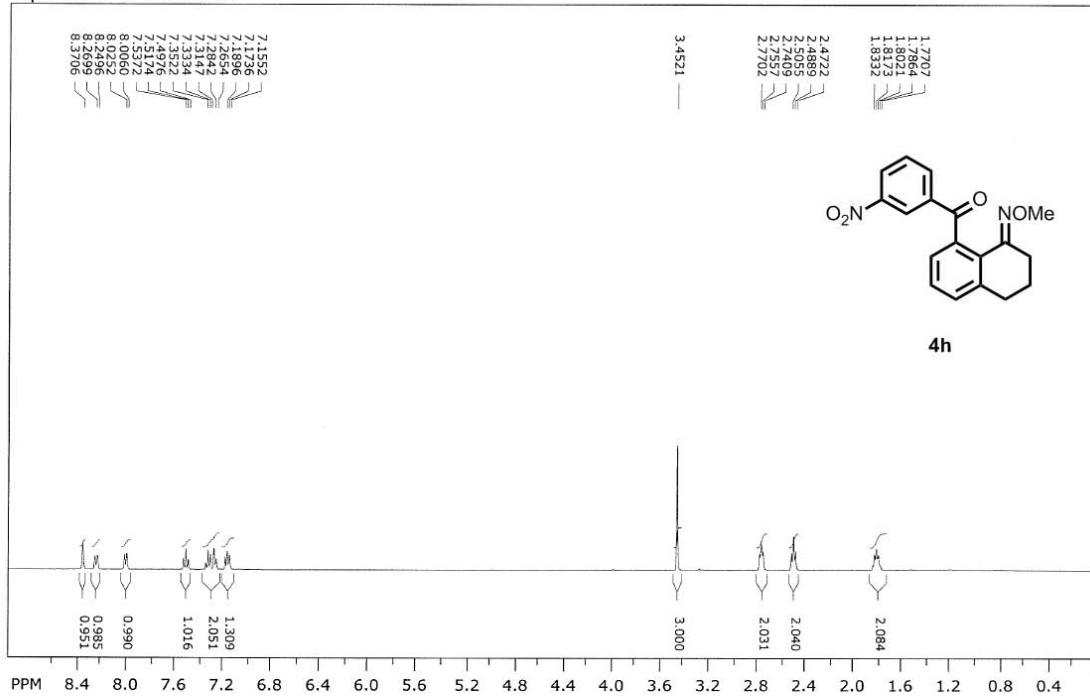

file: ... activation\SKK\_KIS (1)\199H\1\fid exp: <zg30>  
transmitter freq.: 400.131601 MHz  
time domain size: 65536 points  
width: 8012.82 Hz = 20.0255 ppm = 0.122266 Hz/pt  
number of scans: 16

freq. of 0 ppm: 400.130039 MHz  
processed size: 131072 complex points  
LB: 0.000 GF: 0.0000  
Hz/cm: 144.361 ppm/cm: 0.36078

SpinWorks 3: MY148-13C

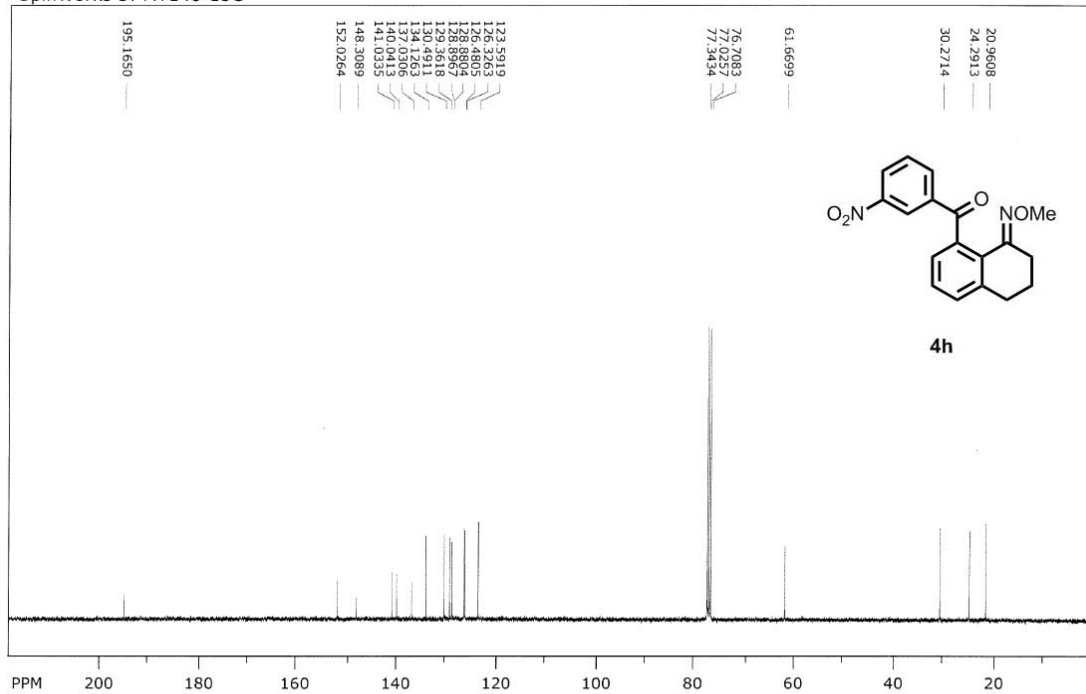

file: ...s\PC\바람 화면\SKK\_KIS\_1116\199C\1\fid exp: <zpgg30>  
transmitter freq.: 100.622829 MHz  
time domain size: 65536 points  
width: 24038.46 Hz = 238.8967 ppm = 0.366798 Hz/pt  
number of scans: 16

freq. of 0 ppm: 100.612769 MHz  
processed size: 32768 complex points  
LB: 0.000 GF: 0.0000  
Hz/cm: 884.809 ppm/cm: 8.79332

SpinWorks 3: MY132-1H

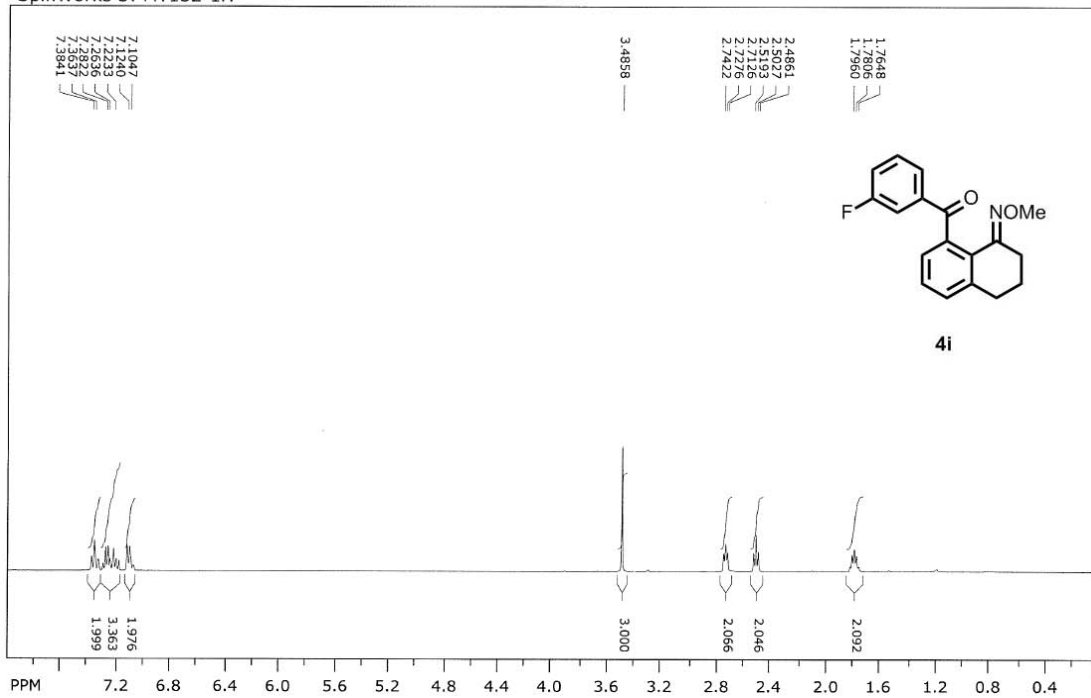

file: ... activation\SKK\_KIS (4)\188H\1\fid exp: <zg30>  
 transmitter freq.: 400.131601 MHz  
 time domain size: 65536 points  
 width: 8012.82 Hz = 20.0255 ppm = 0.122266 Hz/pt

freq. of 0 ppm: 400.130041 MHz  
 processed size: 131072 complex points  
 LB: 0.000 GF: 0.0000  
 Hz/cm: 128.249 ppm/cm: 0.32052

SpinWorks 3: MY-132

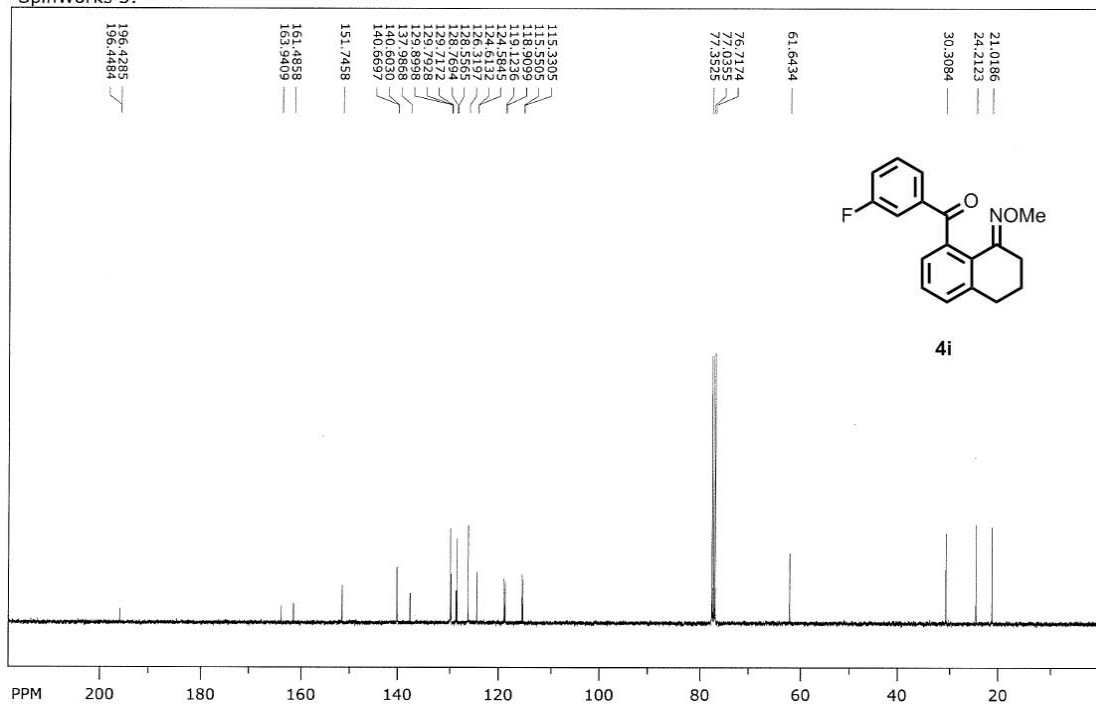

file: ... activation\SKK\_KIS (4)\188C\1\fid exp: <zgpg30>  
 transmitter freq.: 100.622829 MHz  
 time domain size: 65536 points  
 width: 24038.46 Hz = 238.8967 ppm = 0.366798 Hz/pt

freq. of 0 ppm: 100.612769 MHz  
 processed size: 32768 complex points  
 LB: 0.000 GF: 0.0000  
 Hz/cm: 883.152 ppm/cm: 8.77686

SpinWorks 3: MY149-1H

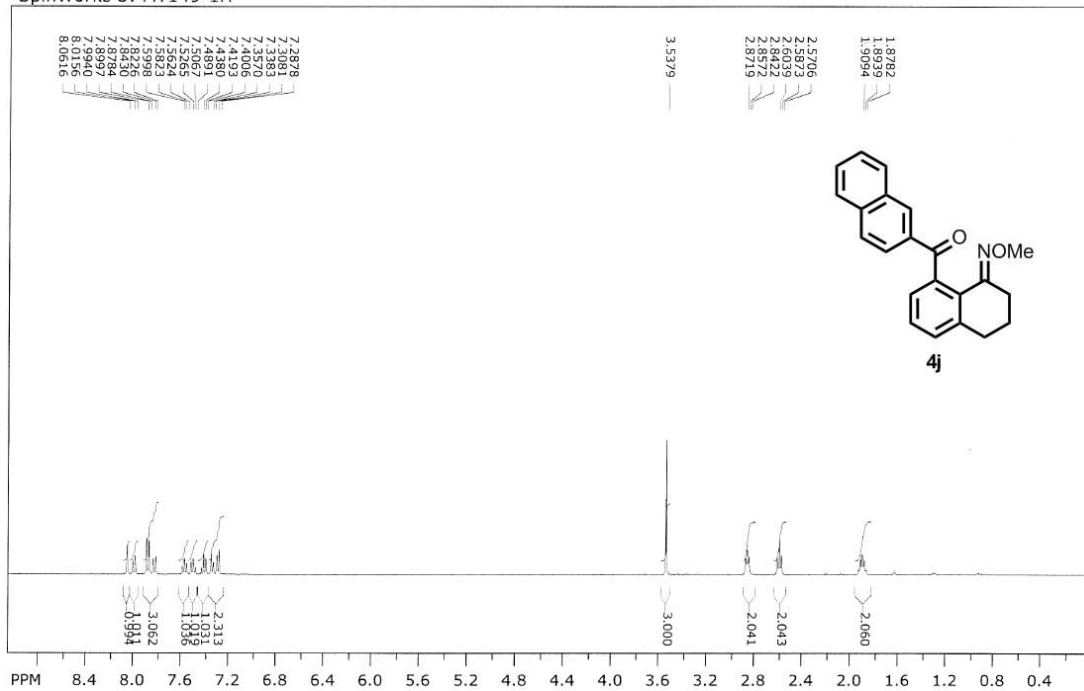

file: ...s\PC\바탕 화면\SKK\_KIS\_1116\197H\1\fid exp: <zg30>  
transmitter freq.: 400.131601 MHz  
time domain size: 65536 points  
width: 8012.82 Hz = 20.0255 ppm = 0.122266 Hz/pt  
number of scans: 16

freq. of 0 ppm: 400.130000 MHz  
processed size: 131072 complex points  
LB: 0.000 GF: 0.0000  
Hz/cm: 145.323 ppm/cm: 0.36319

SpinWorks 3: MY149-13C

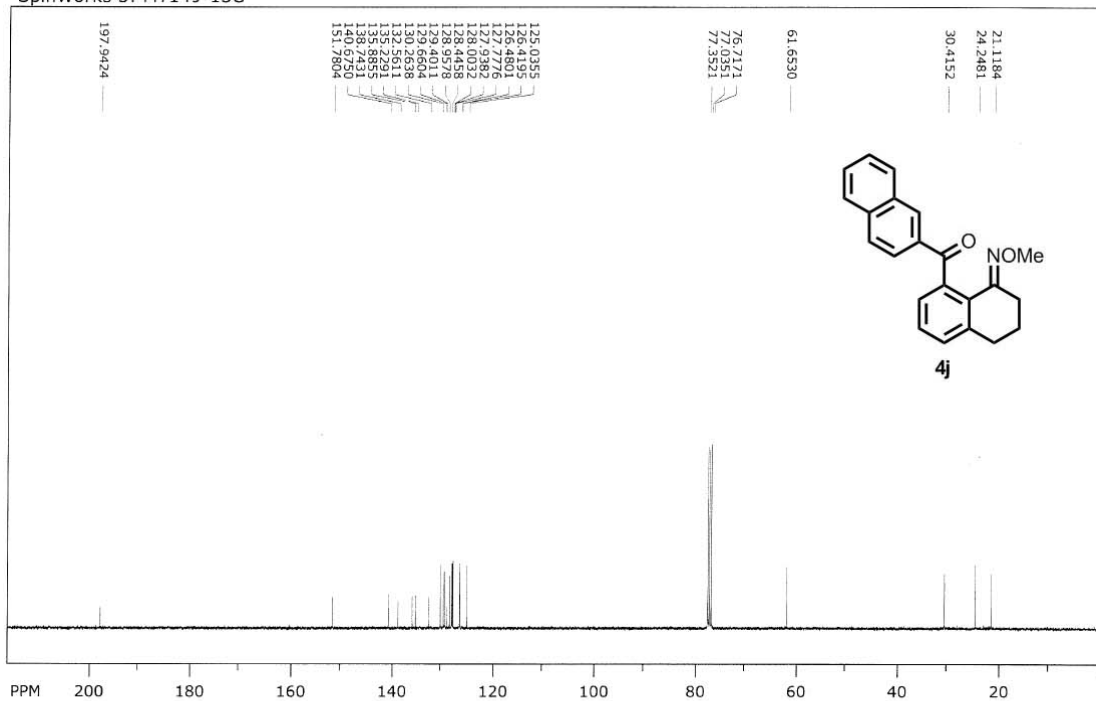

file: ...s\PC\바탕 화면\SKK\_KIS\_1116\197C\1\fid exp: <zpgg30>  
transmitter freq.: 100.622829 MHz  
time domain size: 65536 points  
width: 24038.46 Hz = 238.8967 ppm = 0.366798 Hz/pt  
number of scans: 256

SpinWorks 3: MY176-1H

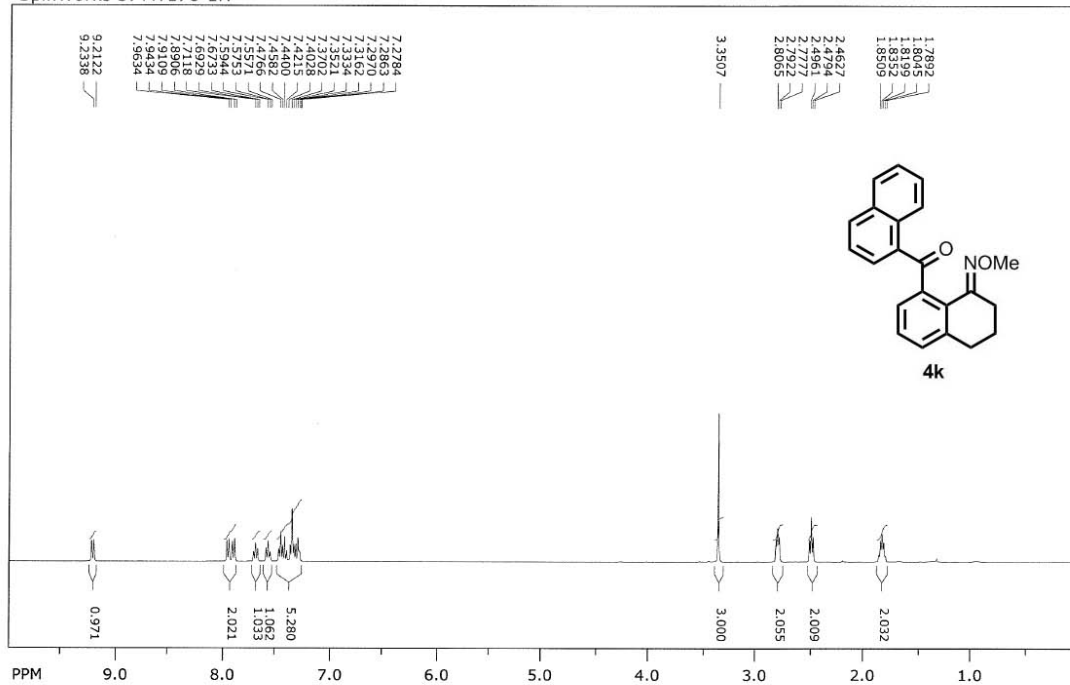

file: ...activation\SKK\_KIS (5)\221H\1\fid exp: <zg30>  
transmitter freq.: 400.131601 MHz  
time domain size: 65536 points  
width: 8012.82 Hz = 20.0255 ppm = 0.122266 Hz/pt  
number of scans: 16

freq. of 0 ppm: 400.130000 MHz  
processed size: 131072 complex points  
LB: 0.000 GF: 0.0000  
Hz/cm: 160.474 ppm/cm: 0.40105

SpinWorks 3: MY-176-13C

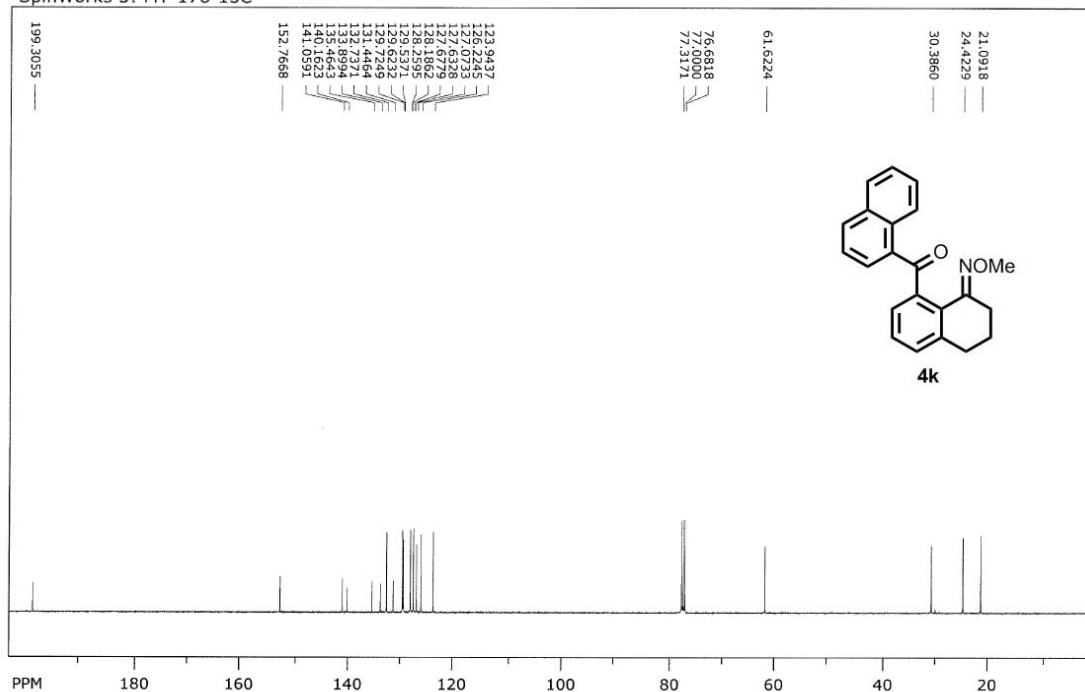

file: ...ettings\aj\Desktop\nmr1\221C\2\fid exp: <zpgg30>  
transmitter freq.: 100.622829 MHz  
time domain size: 65536 points  
width: 24038.46 Hz = 238.8967 ppm = 0.366798 Hz/pt

freq. of 0 ppm: 100.612775 MHz  
processed size: 32768 complex points  
LB: 0.000 GF: 0.0000  
Hz/cm: 819.137 ppm/cm: 8.14066

SpinWorks 3: MY178-1H

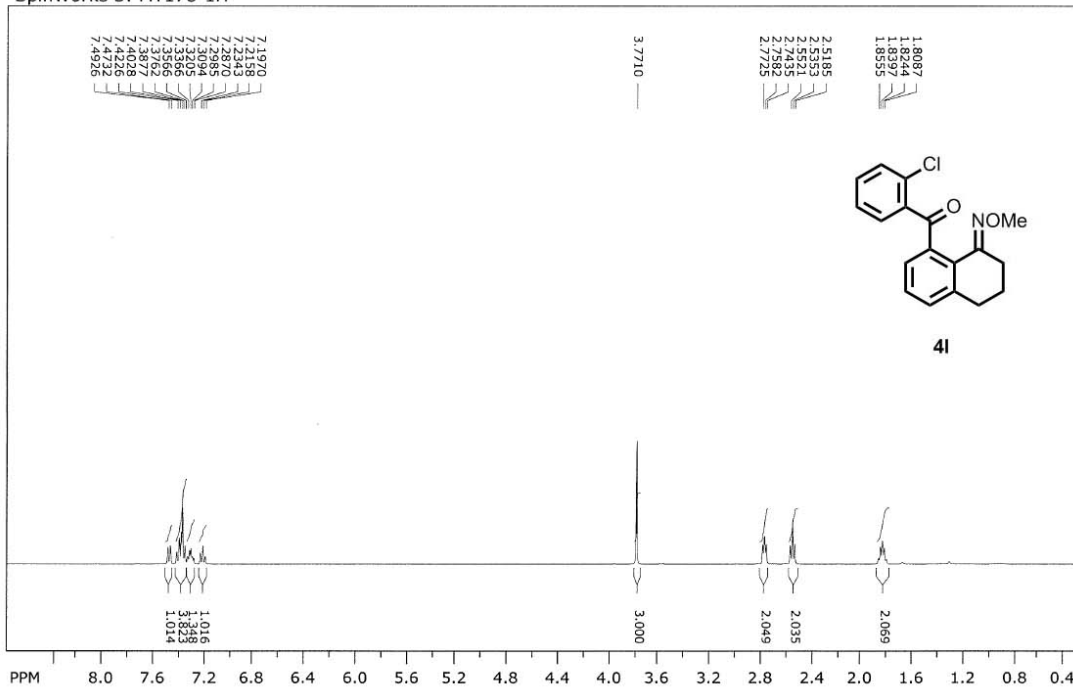

file: ... activation\SKK\_KIS (5)\222H\1\fid exp: <zg30>  
transmitter freq.: 400.131601 MHz  
time domain size: 65536 points  
width: 8012.82 Hz = 20.0255 ppm = 0.122266 Hz/pt  
number of scans: 16

freq. of 0 ppm: 400.130000 MHz  
processed size: 131072 complex points  
LB: 0.000 GF: 0.0000  
Hz/cm: 136.305 ppm/cm: 0.34065

SpinWorks 3: MY-178-13C

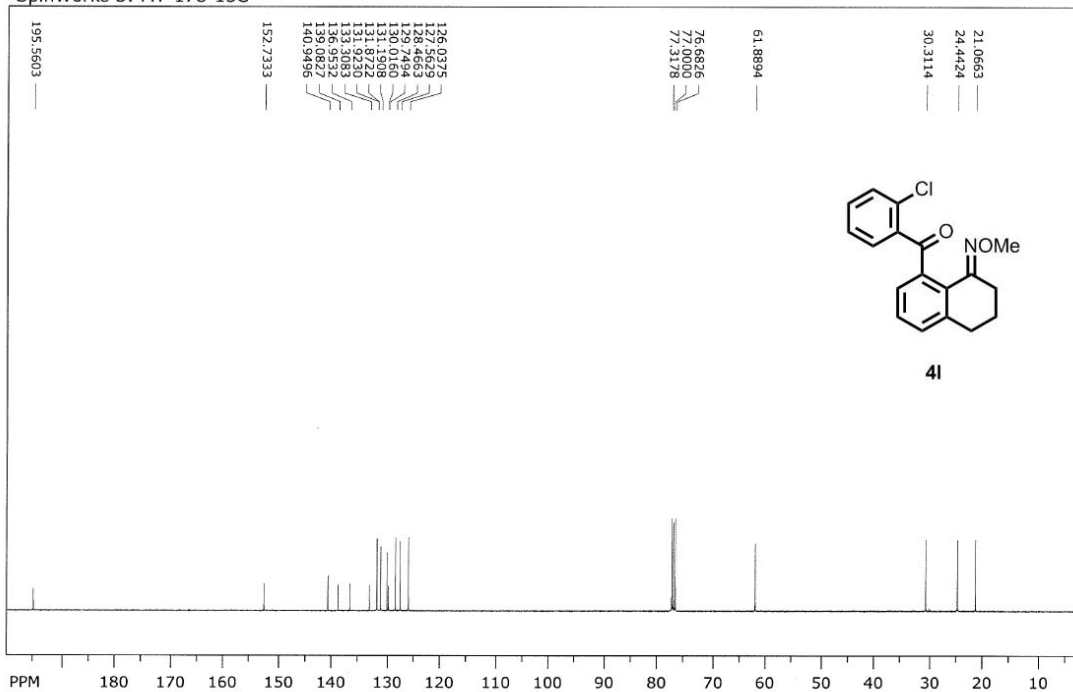

file: ...ettings\aj\Desktop\nmr1\222C\2\fid exp: <zgpg30>  
transmitter freq.: 100.622829 MHz  
time domain size: 65536 points  
width: 24038.46 Hz = 238.8967 ppm = 0.366798 Hz/pt

freq. of 0 ppm: 100.612773 MHz  
processed size: 32768 complex points  
LB: 0.000 GF: 0.0000  
Hz/cm: 804.766 ppm/cm: 7.99785

SpinWorks 3: MY168-1H

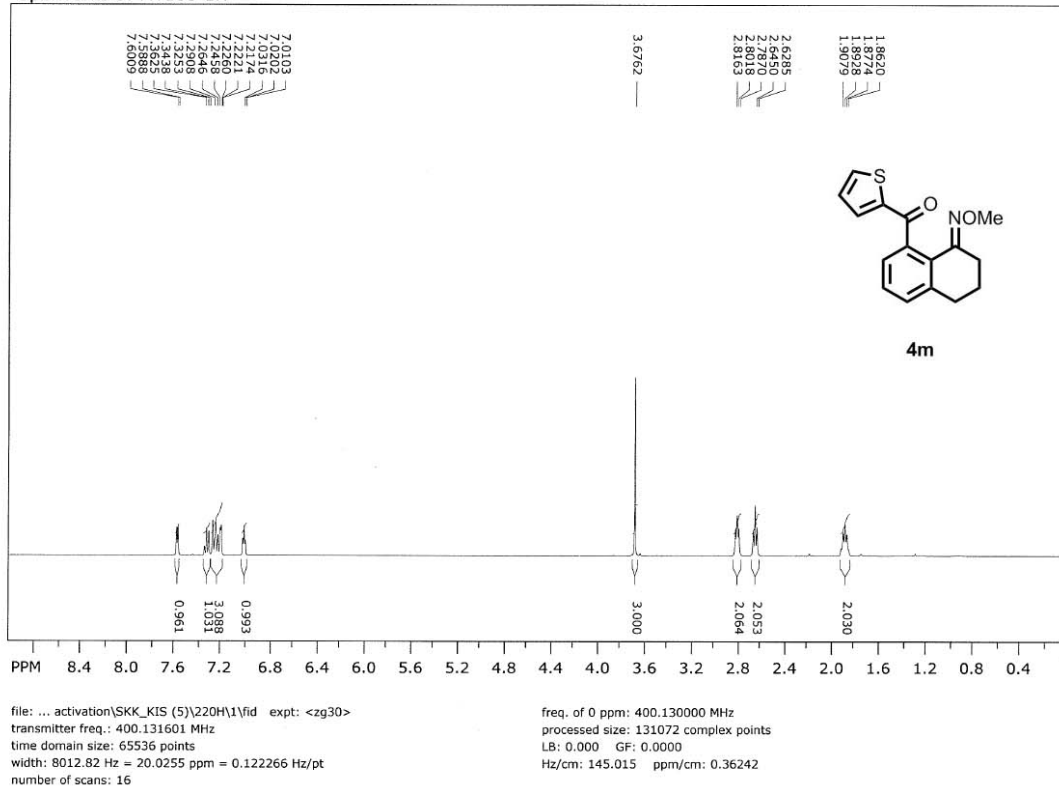

SpinWorks 3: MY-168-13C

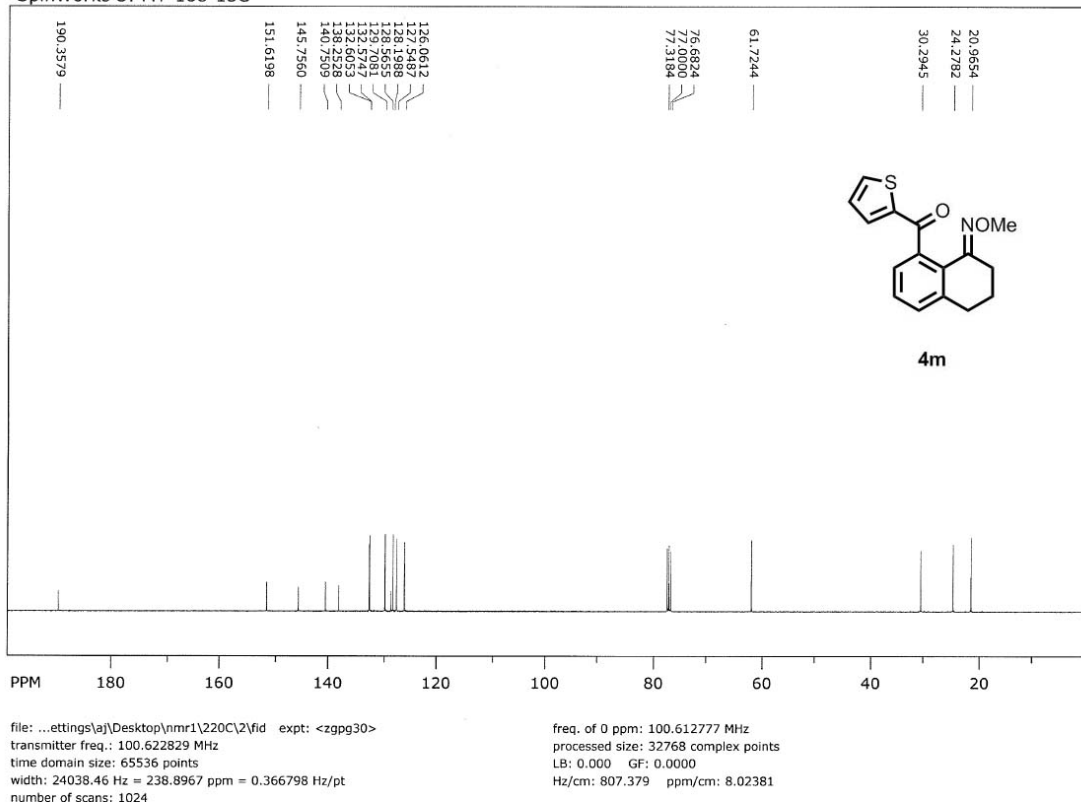



SpinWorks 3: s398

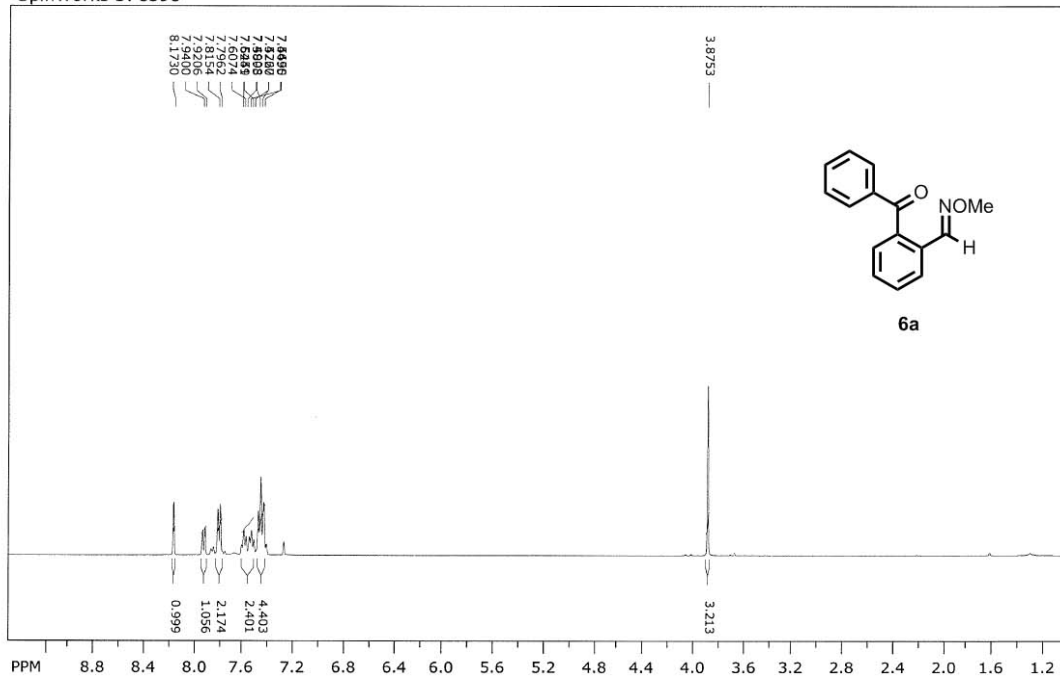

file: ...activation\SKK\_KIS (5)\213h\1\fid exp: <zg30>  
transmitter freq.: 400.131601 MHz  
time domain size: 65536 points  
width: 8012.82 Hz = 20.0255 ppm = 0.122266 Hz/pt  
number of scans: 16

freq. of 0 ppm: 400.130000 MHz  
processed size: 131072 complex points  
LB: 0.000 GF: 0.0000  
Hz/cm: 136.523 ppm/cm: 0.34119

SpinWorks 3: S-398-13C

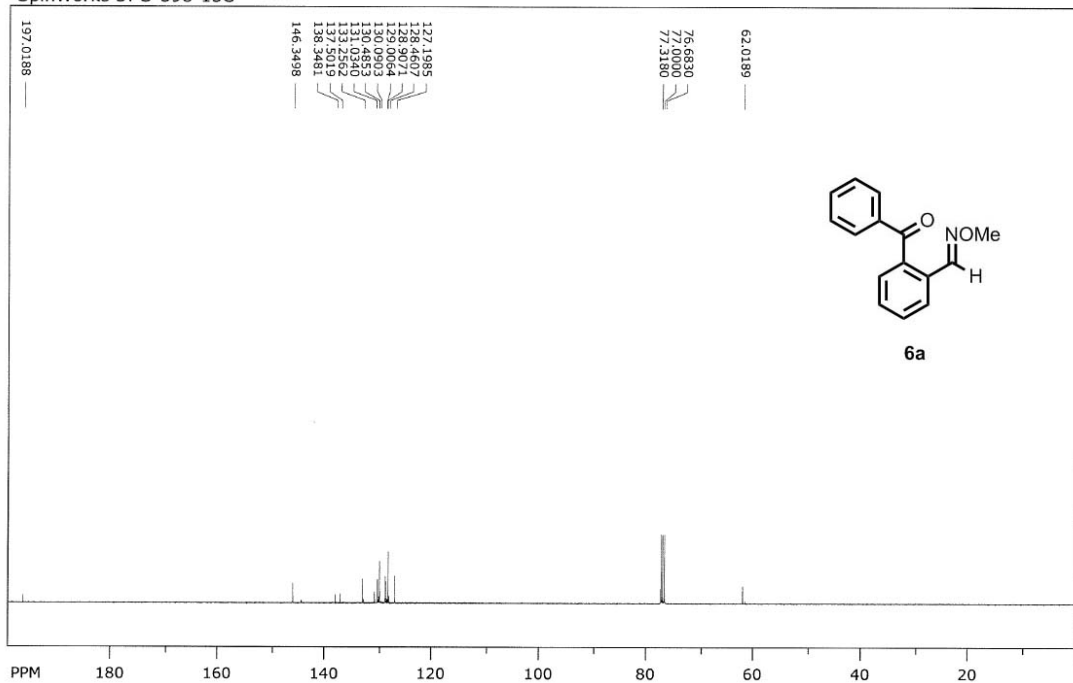

file: ...ettings\aj\Desktop\nmr1\213C\1\fid exp: <zgpg30>  
transmitter freq.: 100.622829 MHz  
time domain size: 65536 points  
width: 24038.46 Hz = 238.8967 ppm = 0.366798 Hz/pt  
number of scans: 1024

freq. of 0 ppm: 100.612770 MHz  
processed size: 32768 complex points  
LB: 0.000 GF: 0.0000  
Hz/cm: 805.419 ppm/cm: 8.00434

SpinWorks 3: MY180-1H

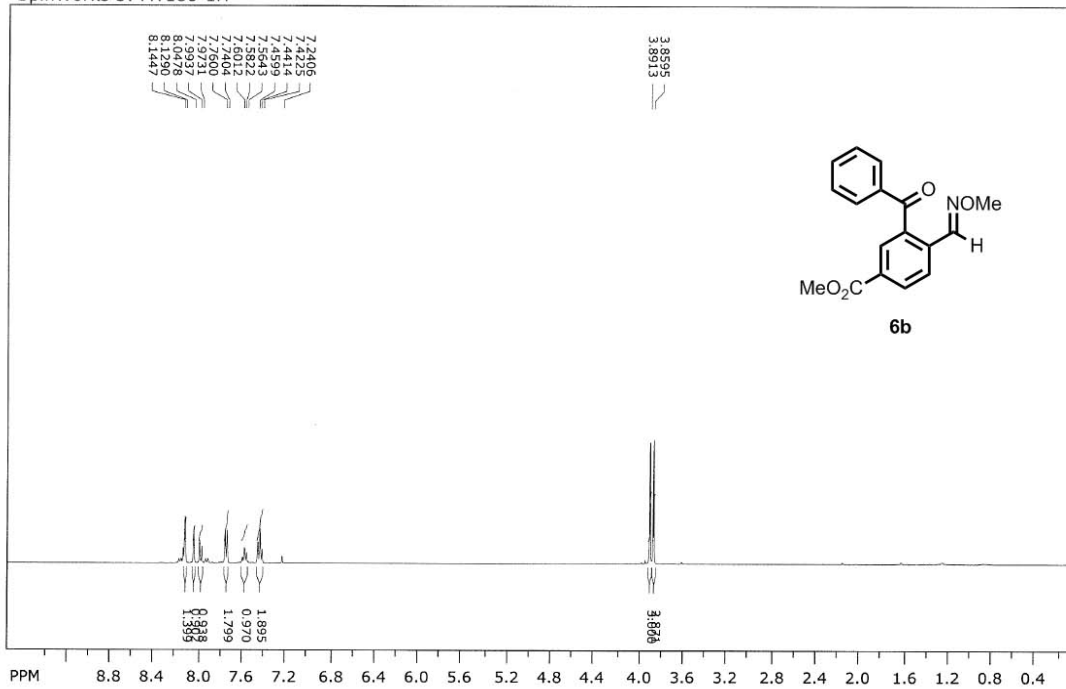

file: ... activation\SKK\_KIS (5)\223H(1)\fid expt: <zg30>  
transmitter freq.: 400.131601 MHz  
time domain size: 65536 points  
width: 8012.82 Hz = 20.0255 ppm = 0.122266 Hz/pt  
number of scans: 16

freq. of 0 ppm: 400.130018 MHz  
processed size: 131072 complex points  
LB: 0.000 GF: 0.0000  
Hz/cm: 155.248 ppm/cm: 0.38799

SpinWorks 3: MY180-13C

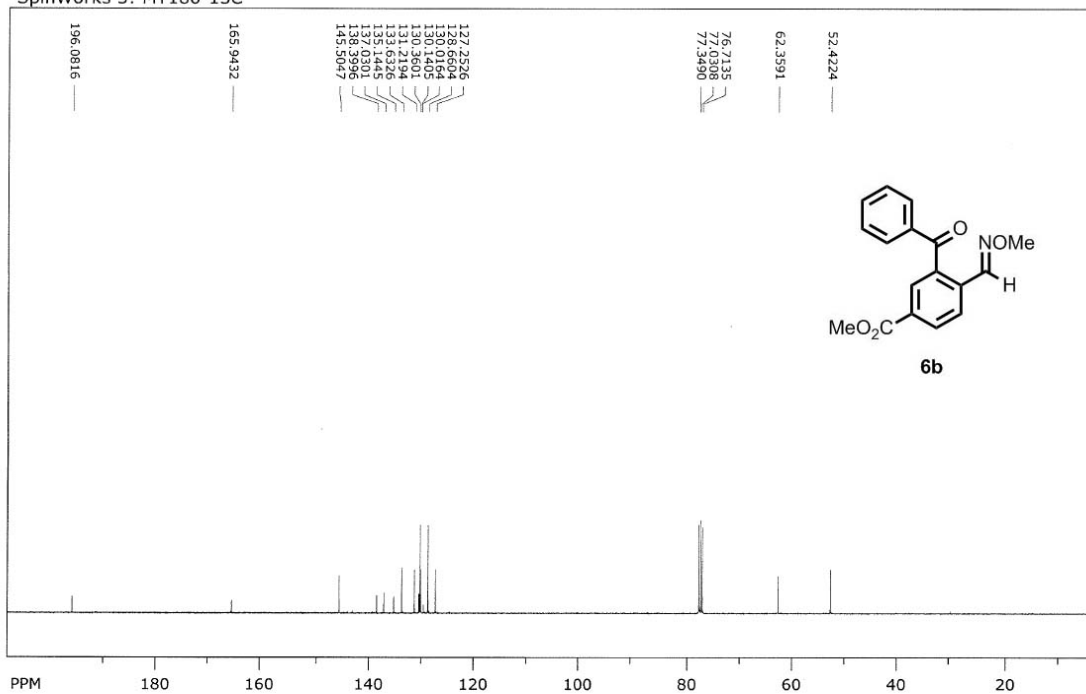

file: ... activation\SKK\_KIS (6)\223C(2)\fid expt: <zpgg30>  
transmitter freq.: 100.622829 MHz  
time domain size: 65536 points  
width: 24038.46 Hz = 238.8967 ppm = 0.366798 Hz/pt  
number of scans: 1024

freq. of 0 ppm: 100.612769 MHz  
processed size: 32768 complex points  
LB: 0.000 GF: 0.0000  
Hz/cm: 827.629 ppm/cm: 8.22506
